# Supplementary material for: Highly diastereoselective Friedel–Crafts reaction of arenes with N-tert-butanesulfinylimino ester towards the efficient synthesis of α-arylglycines
Source: Royal Society of Chemistry journal article supplement (doi:10.1039/c1ob06450a), 2011-01-01

Supplementary Information:

## Highly Diastereoselective Friedel-Crafts reaction of Arenes with an *N*-*tert*-Butanesulfinylimino Ester: Efficient Synthesis of Optically Active $\alpha$ -Arylglycines

Yi Li, Du-Ming Ji and Ming-Hua Xu\*

*Shanghai Institute of Materia Medica, Chinese Academy of Sciences, 555 Zuchongzhi Road, Shanghai 201203, People's Republic of China.*

*E-Mail: [xumh@mail.shcnc.ac.cn](mailto:xumh@mail.shcnc.ac.cn)*

### Table of Contents

|                                                                                                                                                            |    |
|------------------------------------------------------------------------------------------------------------------------------------------------------------|----|
| 1. General.....                                                                                                                                            | 2  |
| 2. General Procedure for In(OTf) <sub>3</sub> -catalyzed Friedel-Crafts Reaction of Arenes 1 with <i>N</i> - <i>tert</i> -Butanesulfinylimino Ester 2..... | 2  |
| 3. Determination of the Diastereoselectivity / Enantiomeric Excess.....                                                                                    | 2  |
| 4. Characterization and HPLC of the Obtained Chiral $\alpha$ -Arylglycines.....                                                                            | 3  |
| 5. General procedure for the synthesis of the chiral Friedel-Crafts dialkylation product (4).<br>.....                                                     | 21 |
| 6. Characterization and HPLC of the chiral Friedel-Crafts dialkylation product (4).....                                                                    | 22 |
| 7. The synthesis and HPLC of ( <i>R</i> )-2-(chloroamino)-2-(2,4-dimethoxyphenyl)acetic acid (( <i>R</i> )-5).<br>.....                                    | 23 |
| 8. Copies of <sup>1</sup> H and <sup>13</sup> C NMR Spectra of Compounds 3a-p, 4 and ( <i>R</i> )-5. ....                                                  | 24 |

## 1. General

Unless otherwise specified, all reactions were carried out in flame-dried glassware with magnetic stirring under an atmosphere of nitrogen. Solvents were dried and distilled by standard procedures. NMR spectra were recorded on a Varian spectrometer (300 MHz for  $^1\text{H}$ , and 100 MHz for  $^{13}\text{C}$ ). Chemical shifts are reported in  $\delta$  ppm referenced to an internal  $\text{SiMe}_4$  standard for  $^1\text{H}$  NMR and chloroform-*d* ( $\delta$  77.16) for  $^{13}\text{C}$  NMR. HPLC was performed on a JASCO 2000 instrument by using Daicel AS-H, AD-H and AD-3 column with 2-propanol/hexane as the eluent at 214 nm.

## 2. General Procedure for $\text{In}(\text{OTf})_3$ -catalyzed Friedel-Crafts Reaction of Arenes **1** with *N*-*tert*-Butanesulfinylimino Ester **2**.

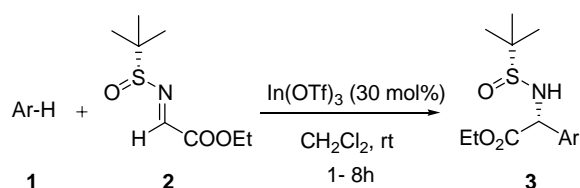

Under nitrogen atmosphere,  $\text{In}(\text{OTf})_3$  (0.075 mmol, 30 mol%) was placed into a glass reaction vessel, glyoxylate imine **2** (0.25 mmol) in 2 mL of dry  $\text{CH}_2\text{Cl}_2$  and arene **1** (0.375 mmol) were added successively. The mixture was stirred at room temperature and monitored by TLC. When the reaction was over, a saturated aq.  $\text{NH}_4\text{Cl}$  was added and the mixture was extracted with  $\text{CH}_2\text{Cl}_2$  (10 mL $\times$ 3). The combined organic phase was dried over  $\text{Na}_2\text{SO}_4$ , filtered, and concentrated. The residue was purified by silica gel flash chromatography to afford the corresponding  $\alpha$ -arylglycine product **3**.

## 3. Determination of the Diastereoselectivity / Enantiomeric Excess.

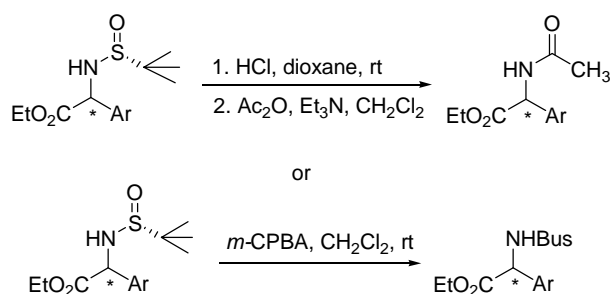

The diastereoselectivities of the  $\alpha$ -arylglycine products were measured as enantiomeric excess for their acetate or *N*-sulfonylate derivatives after the removal or oxidation of the sulfinyl group by chiral HPLC analysis.  $\alpha$ -Arylglycines **3e** and **4** were converted to the corresponding *N*-sulfonylate, all others were converted to their acetate. The HPLC reference compound was a mixture of related products consisting of *R* and *S* enantiomers.

#### 4. Characterization and HPLC of the Obtained Chiral $\alpha$ -Arylglycines

(*R*)-ethyl 2-(2,4-dimethoxyphenyl)-2((*R*)-1,1-dimethylethylsulfonamido)acetate (**3a**).

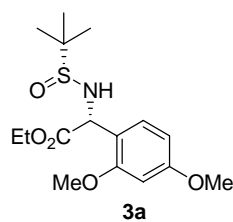

89% yield, yellow oil.  $^1\text{H}$  NMR (300 MHz,  $\text{CDCl}_3$ ):  $\delta$  1.15 (s, 9H), 1.18 (t, 3H), 3.77 (s, 3H), 3.79 (s, 3H), 4.13-4.20 (m, 2H), 4.51 (d,  $J = 4.2$  Hz, 1H), 5.19 (d,  $J = 4.2$  Hz, 1H), 6.43-6.45 (m, 2H), 7.10 (d,  $J = 9.0$  Hz, 1H);  $^{13}\text{C}$  NMR (100 MHz,  $\text{CDCl}_3$ ):  $\delta$  14.14, 22.51, 55.39, 55.55, 55.82, 56.00, 61.85, 98.94, 104.22, 118.74, 130.12, 158.21, 161.03, 172.03; ESI-MS ( $m/z$ , %) 344  $[\text{M}+\text{H}]^+$ ; ESI-HRMS calcd for  $\text{C}_{16}\text{H}_{25}\text{NNaO}_5\text{S}$   $[\text{M}+\text{Na}^+]$  366.1351, found 366.1351.

HPLC (acetate): 98% de. Chiracel AD-H Column (250 mm); detected at 214 nm; n-hexane / i-propanol = 90 / 10; flow = 0.7 mL / min; Retention time: 21.8 min (maj), 23.8 min.

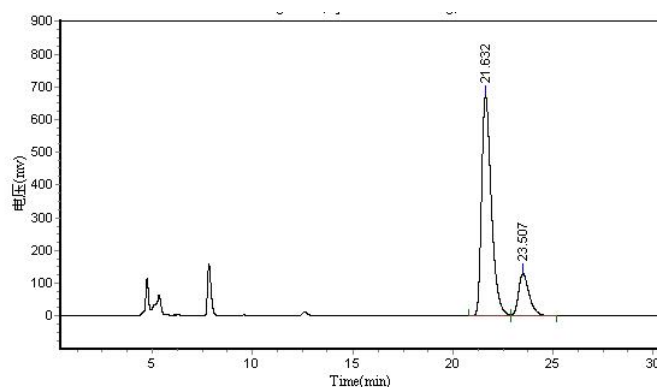

Results

| Peak No.     | Peak ID | Ret Time | Height     | Area         | Conc.    |
|--------------|---------|----------|------------|--------------|----------|
| 1            |         | 21.632   | 674104.563 | 22894638.000 | 82.5333  |
| 2            |         | 23.507   | 129262.539 | 4845249.500  | 17.4667  |
| <b>Total</b> |         |          | 803367.102 | 27739887.500 | 100.0000 |

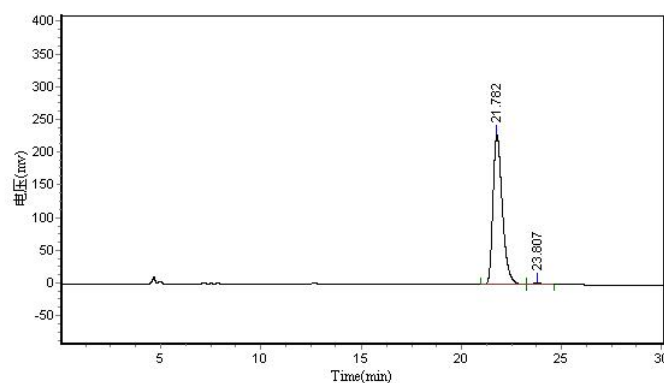

Results

| Peak No.     | Peak ID | Ret Time | Height     | Area        | Conc.    |
|--------------|---------|----------|------------|-------------|----------|
| 1            |         | 21.782   | 228540.984 | 7478351.000 | 99.1270  |
| 2            |         | 23.807   | 1939.009   | 65857.797   | 0.8730   |
| <b>Total</b> |         |          | 230479.993 | 7544208.797 | 100.0000 |

(*R*)-ethyl 2-((*R*)-1,1-dimethylethylsulfonamido)-2-(2,4,6-trimethoxyphenyl)acetate (**3b**).

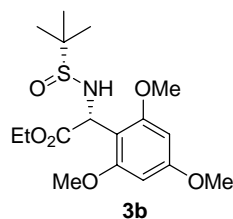

91% yield, colorless oil. <sup>1</sup>H NMR (300 MHz, CDCl<sub>3</sub>): δ 1.10 (s, 9H), 1.17 (t, 3H), 3.77 (s, 6H), 3.80 (s, 3H), 4.09-4.22 (m, 2H), 4.58 (d, *J* = 5.1 Hz, 1H), 5.49 (d, *J* = 5.1 Hz, 1H), 6.09 (s, 2H); <sup>13</sup>C NMR (100 MHz, CDCl<sub>3</sub>): δ 14.27, 22.44, 51.35, 55.39, 55.76, 55.85, 61.59, 90.68, 107.92, 158.83, 161.38, 172.55; ESI-MS (*m/z*, %) 374 [M+H]<sup>+</sup>; ESI-HRMS calcd for C<sub>17</sub>H<sub>27</sub>NNaO<sub>6</sub>S [M+Na]<sup>+</sup> 396.1457, found 396.1454.

HPLC (acetate): 97% de. Chiracel AD-3 Column (250 mm); detected at 214 nm; n-hexane / i-propanol = 95 / 5; flow = 0.7 mL / min; Retention time: 58.2 min (maj), 63.9 min.

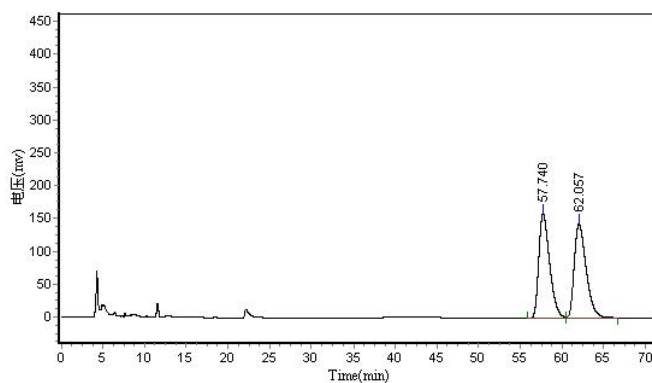

Results

| Peak No.     | Peak ID | Ret Time | Height     | Area         | Conc.    |
|--------------|---------|----------|------------|--------------|----------|
| 1            |         | 57.740   | 158619.875 | 14331035.000 | 50.0777  |
| 2            |         | 62.057   | 143025.125 | 14286591.000 | 49.9223  |
| <b>Total</b> |         |          | 301645.000 | 28617626.000 | 100.0000 |

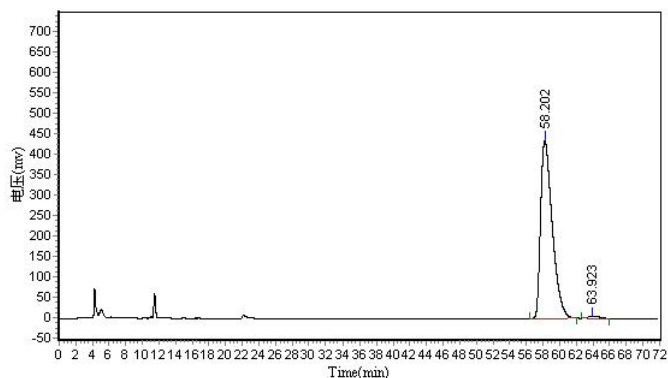

Results

| Peak No.     | Peak ID | Ret Time | Height     | Area         | Conc.    |
|--------------|---------|----------|------------|--------------|----------|
| 1            |         | 58.202   | 434911.063 | 42354564.000 | 98.6595  |
| 2            |         | 63.923   | 6152.331   | 575495.313   | 1.3405   |
| <b>Total</b> |         |          | 441063.393 | 42930059.313 | 100.0000 |

(*R*)-ethyl 2-(2,4-dimethoxy-6-methylphenyl)-2-((*R*)-1,1-dimethylethylsulfonamido)acetate (**3c**).

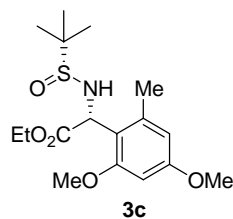

84% yield, colorless oil. <sup>1</sup>H NMR (300 MHz, CDCl<sub>3</sub>): δ 1.11 (s, 9H), 1.16 (t, 3H), 2.36 (s, 3H), 3.73 (s, 3H), 3.78 (s, 3H), 4.09-4.21 (m, 2H), 4.63 (d, *J* = 3.0 Hz, 1H), 5.33 (d, *J* = 3.9 Hz, 1H), 6.29 (d, *J* = 5.7 Hz, 2H); <sup>13</sup>C NMR (100 MHz, CDCl<sub>3</sub>): δ 14.24, 20.24, 22.50, 53.44, 55.26, 55.63, 55.71, 61.79, 96.58, 107.05, 117.52, 139.22, 158.74, 160.17, 172.34; ESI-MS (*m/z*, %) 358 [M+H]<sup>+</sup>; ESI-HRMS calcd for C<sub>17</sub>H<sub>28</sub>NO<sub>5</sub>S [M+H]<sup>+</sup> 358.1688, found 358.1697.

HPLC (**acetate**): 95% de. Chiracel AD-H Column (250 mm); detected at 214 nm; n-hexane / i-propanol = 95 / 5; flow = 0.7 mL / min; Retention time: 28.0 min (maj), 31.3 min.

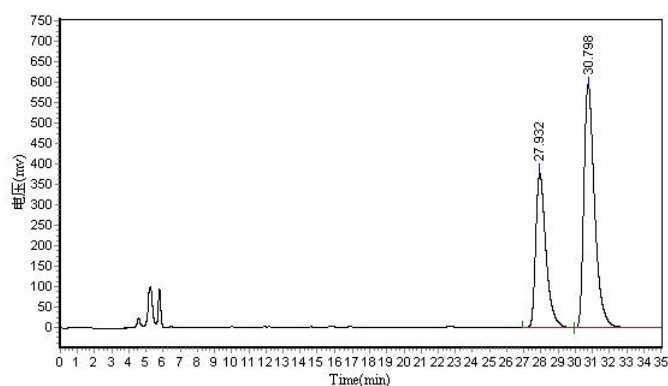

| Results      |         |          |            |              |          |
|--------------|---------|----------|------------|--------------|----------|
| Peak No.     | Peak ID | Ret Time | Height     | Area         | Conc.    |
| 1            |         | 27.932   | 374280.063 | 15683889.000 | 37.6559  |
| 2            |         | 30.798   | 594641.938 | 25966694.000 | 62.3441  |
| <b>Total</b> |         |          | 968922.000 | 41650583.000 | 100.0000 |

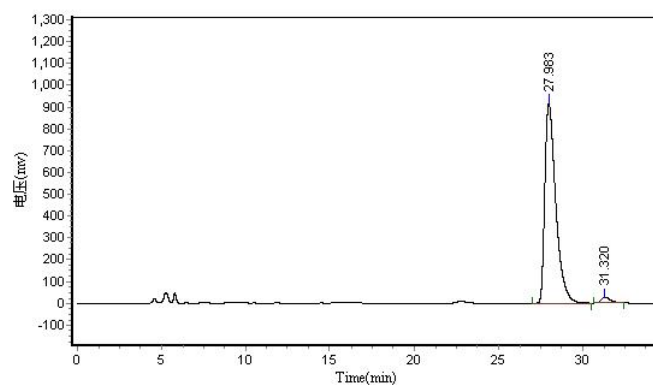

| Results      |         |          |            |              |          |
|--------------|---------|----------|------------|--------------|----------|
| Peak No.     | Peak ID | Ret Time | Height     | Area         | Conc.    |
| 1            |         | 27.983   | 914985.313 | 41353624.000 | 97.4477  |
| 2            |         | 31.320   | 25893.891  | 1083123.125  | 2.5523   |
| <b>Total</b> |         |          | 940879.203 | 42436747.125 | 100.0000 |

(*R*)-ethyl 2-(2-chloro-4,6-dimethoxyphenyl)-2-((*R*)-1,1-dimethylethylsulfonamido)acetate (**3d**).

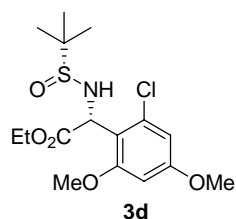

80% yield, yellow oil. <sup>1</sup>H NMR (300 MHz, CDCl<sub>3</sub>): δ 1.12 (s, 9H), 1.18 (t, 3H), 3.76 (s, 3H), 3.79 (s, 3H), 4.09-4.23 (m, 2H), 4.59 (d, *J* = 4.2 Hz, 1H), 5.60 (d, *J* = 4.2 Hz, 1H), 6.34 (d, *J* = 2.1 Hz, 1H), 6.52 (d, *J* = 2.4 Hz, 1H); <sup>13</sup>C NMR (100 MHz, CDCl<sub>3</sub>): δ 14.22, 22.44, 55.65, 55.91, 56.01, 62.07, 97.93, 106.12, 117.96, 135.60, 159.09, 160.55, 171.42; ESI-MS (*m/z*, %) 378 [M+H]<sup>+</sup>; ESI-HRMS calcd for C<sub>16</sub>H<sub>24</sub>ClNNaO<sub>5</sub>S [M+Na<sup>+</sup>] 400.0961, found 400.0945.

HPLC (**acetate**): 98% de. Chiracel AD-H Column (250 mm); detected at 214 nm; n-hexane / i-propanol = 90 / 10; flow = 0.7 mL / min; Retention time: 18.6 min (maj), 21.8 min.

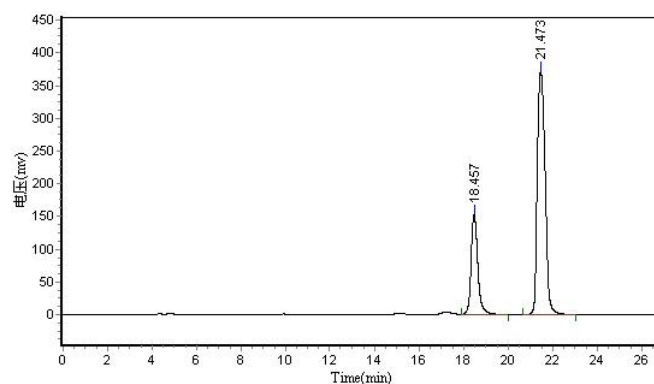

| Results      |         |          |            |              |          |
|--------------|---------|----------|------------|--------------|----------|
| Peak No.     | Peak ID | Ret Time | Height     | Area         | Conc.    |
| 1            |         | 18.457   | 151422.688 | 3190979.000  | 25.9984  |
| 2            |         | 21.473   | 371378.250 | 9082754.000  | 74.0016  |
| <b>Total</b> |         |          | 522800.938 | 12273733.000 | 100.0000 |

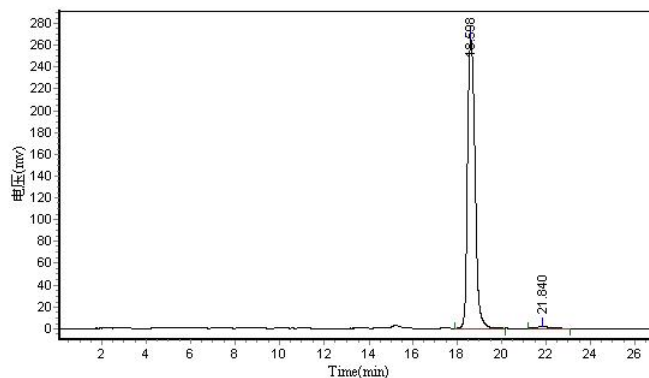

| Results      |         |          |            |             |          |
|--------------|---------|----------|------------|-------------|----------|
| Peak No.     | Peak ID | Ret Time | Height     | Area        | Conc.    |
| 1            |         | 18.598   | 264955.781 | 6240307.000 | 98.9436  |
| 2            |         | 21.840   | 1725.836   | 66625.203   | 1.0564   |
| <b>Total</b> |         |          | 266681.617 | 6306932.203 | 100.0000 |

(*R*)-ethyl 2-((*R*)-1,1-dimethylethylsulfonamido)-2-(2,4,5-trimethoxyphenyl)acetate (**3e**).

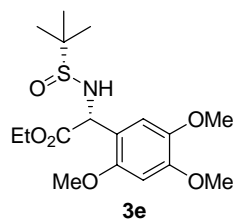

86% yield, colorless oil. <sup>1</sup>H NMR (300 MHz, CDCl<sub>3</sub>): δ 1.16 (s, 9H), 1.17 (t, 3H), 3.79 (s, 3H), 3.80 (s, 3H), 3.87 (s, 3H), 4.11-4.21 (m, 2H), 4.51 (d, *J* = 3.3 Hz, 1H), 5.30 (d, *J* = 3.9 Hz, 1H), 6.51 (s, 1H), 6.74 (s, 1H); <sup>13</sup>C NMR (100 MHz, CDCl<sub>3</sub>): δ 14.15, 22.56, 55.13, 55.85, 56.09, 56.57, 56.93, 61.97, 97.96, 112.45, 117.52, 143.19, 149.81, 151.89, 171.98; ESI-MS (*m/z*, %) 396 [M+Na]<sup>+</sup>; ESI-HRMS calcd for C<sub>17</sub>H<sub>27</sub>NNaO<sub>6</sub>S [M+Na]<sup>+</sup> 396.1457, found 396.1455.

HPLC (sulfonate): 98% de. Chiracel AD-H Column (250 mm); detected at 214 nm; n-hexane / i-propanol = 80 / 20; flow = 0.7 mL / min; Retention time: 30.2 min (maj), 40.4 min.

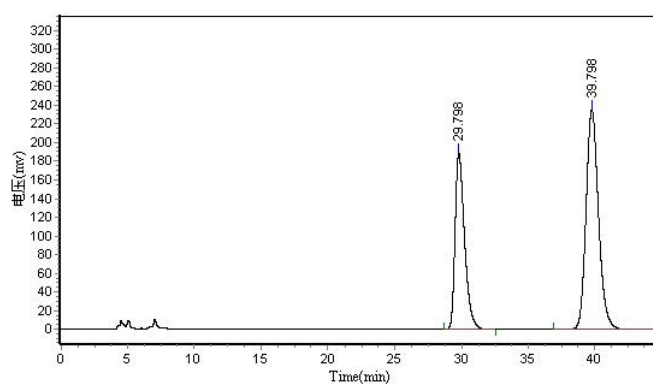

| Results      |         |          |            |              |          |  |
|--------------|---------|----------|------------|--------------|----------|--|
| Peak No.     | Peak ID | Ret Time | Height     | Area         | Conc.    |  |
| 1            |         | 29.798   | 187152.141 | 9339194.000  | 37.9489  |  |
| 2            |         | 39.798   | 234610.594 | 15270694.000 | 62.0511  |  |
| <b>Total</b> |         |          | 421762.734 | 24609888.000 | 100.0000 |  |

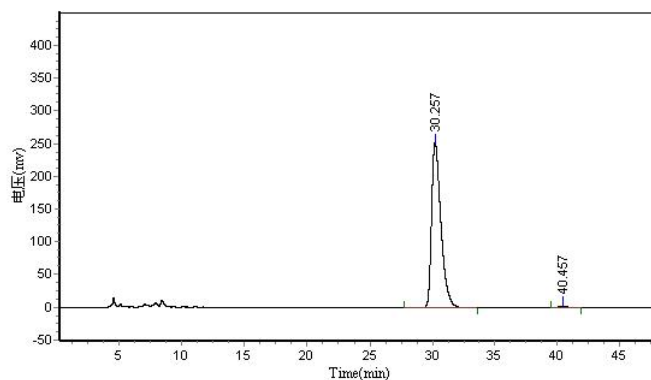

| Results      |         |          |            |              |          |  |
|--------------|---------|----------|------------|--------------|----------|--|
| Peak No.     | Peak ID | Ret Time | Height     | Area         | Conc.    |  |
| 1            |         | 30.257   | 252606.844 | 13109203.000 | 99.2008  |  |
| 2            |         | 40.457   | 1576.393   | 105611.766   | 0.7992   |  |
| <b>Total</b> |         |          | 254183.237 | 13214814.766 | 100.0000 |  |

(*R*)-ethyl 2-((*R*)-1,1-dimethylethylsulfonamido)-2-(2-hydroxy-4,5-dimethoxyphenyl)acetate (**3f**).

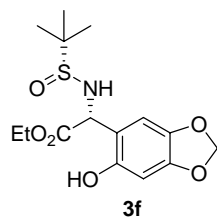

72% yield, yellow oil.  $^1\text{H NMR}$  (300 MHz,  $\text{CDCl}_3$ ):  $\delta$  1.21 (t, 3H), 1.25 (s, 9H), 4.10-4.28 (m, 2H), 4.52 (d,  $J = 1.5$  Hz, 1H), 5.21 (d,  $J = 2.7$  Hz, 1H), 5.89 (s, 2H), 6.46 (s, 1H), 6.62 (s, 1H), 7.90 (br, 1H);  $^{13}\text{C NMR}$  (100 MHz,  $\text{CDCl}_3$ ):  $\delta$  14.16, 22.71, 55.87, 56.30, 62.49, 99.56, 101.35, 108.15, 113.68, 141.28, 148.77, 150.90, 171.63; ESI-MS ( $m/z$ , %) 344 [ $\text{M}+\text{H}$ ] $^+$ .

HPLC (**acetate**): 93% de. Chiralcel AD-H Column (250 mm); detected at 214 nm; n-hexane / i-propanol = 80 / 20; flow = 0.7 mL / min; Retention time: 13.8 min, 16.7 min (maj).

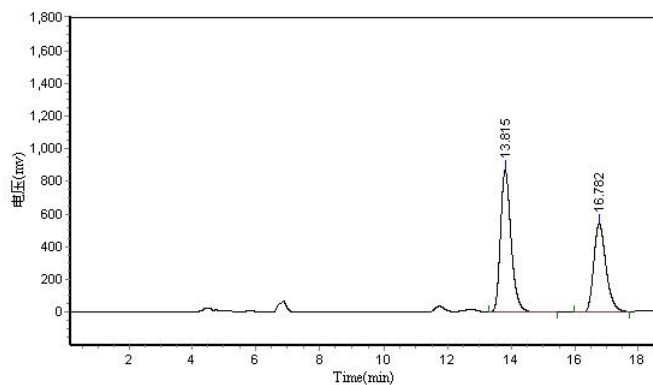

Results

| Peak No.     | Peak ID | Ret Time | Height      | Area         | Conc.    |
|--------------|---------|----------|-------------|--------------|----------|
| 1            |         | 13.815   | 865754.625  | 20158124.000 | 57.9533  |
| 2            |         | 16.782   | 541351.438  | 14625280.000 | 42.0467  |
| <b>Total</b> |         |          | 1407106.063 | 34783404.000 | 100.0000 |

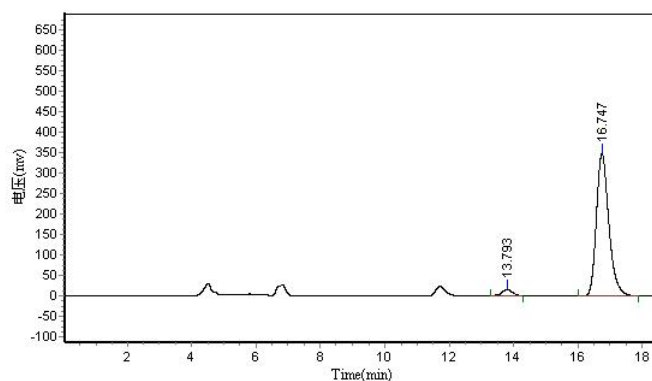

Results

| Peak No.     | Peak ID | Ret Time | Height     | Area        | Conc.    |
|--------------|---------|----------|------------|-------------|----------|
| 1            |         | 13.793   | 15598.970  | 338129.750  | 3.4856   |
| 2            |         | 16.747   | 346773.219 | 9362763.000 | 96.5144  |
| <b>Total</b> |         |          | 362372.188 | 9700892.750 | 100.0000 |



(*R*)-ethyl 2-((*R*)-1,1-dimethylethylsulfonamido)-2-(2,3,4-trimethoxyphenyl)acetate (**3g**).

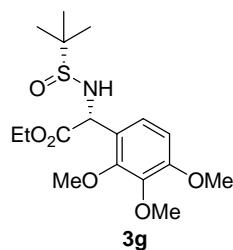

60% yield, yellow oil.  $^1\text{H}$  NMR (300 MHz,  $\text{CDCl}_3$ ):  $\delta$  1.17 (s, 9H), 1.18 (t, 3H), 3.84 (s, 6H), 3.88 (s, 3H), 4.11-4.24 (m, 2H), 4.59 (d,  $J = 3.9$  Hz, 1H), 5.18 (d,  $J = 3.6$  Hz, 1H), 6.60 (d,  $J = 8.4$  Hz, 1H), 6.91 (d,  $J = 8.4$  Hz, 1H);  $^{13}\text{C}$  NMR (100 MHz,  $\text{CDCl}_3$ ):  $\delta$  14.13, 22.61, 55.75, 55.84, 55.98, 60.77, 61.14, 62.06, 106.98, 123.75, 123.90, 142.15, 151.91, 154.07, 171.84; ESI-MS ( $m/z$ , %) 374 [ $\text{M}+\text{H}$ ] $^+$ ; ESI-HRMS calcd for  $\text{C}_{17}\text{H}_{27}\text{NNaO}_6\text{S}$  [ $\text{M}+\text{Na}^+$ ] 396.1457, found 396.1467.

HPLC (acetate): 70% de. Chiracel AD-H Column (250 mm); detected at 214 nm; n-hexane / i-propanol = 90 / 10; flow = 0.7 mL / min; Retention time: 21.6 min (maj), 27.8 min.

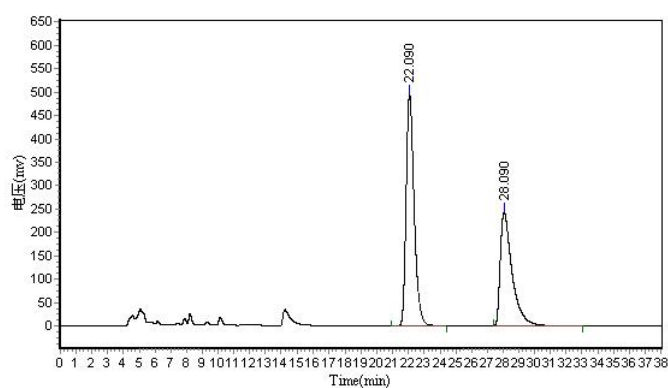

| Results      |         |          |            |              |          |
|--------------|---------|----------|------------|--------------|----------|
| Peak No.     | Peak ID | Ret Time | Height     | Area         | Conc.    |
| 1            |         | 22.090   | 495091.188 | 17524566.000 | 58.1538  |
| 2            |         | 28.090   | 242659.625 | 12610315.000 | 41.8462  |
| <b>Total</b> |         |          | 737750.813 | 30134881.000 | 100.0000 |

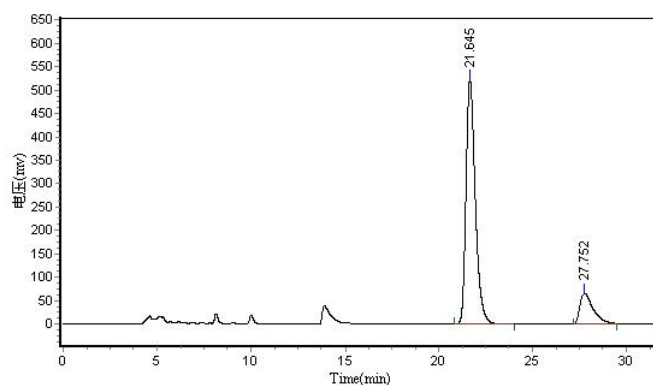

| Results      |         |          |            |              |          |
|--------------|---------|----------|------------|--------------|----------|
| Peak No.     | Peak ID | Ret Time | Height     | Area         | Conc.    |
| 1            |         | 21.645   | 523384.250 | 17966410.000 | 84.7425  |
| 2            |         | 27.752   | 65641.320  | 3234764.000  | 15.2575  |
| <b>Total</b> |         |          | 589025.570 | 21201174.000 | 100.0000 |

(*R*)-ethyl 2-((*R*)-1,1-dimethylethylsulfinamido)-2-(2,3,4-trimethoxy-6-methylphenyl)acetate (**3h**).

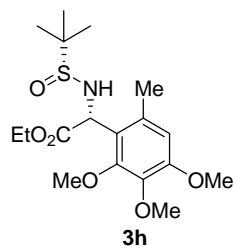

74% yield, yellow oil.  $^1\text{H}$  NMR (300 MHz,  $\text{CDCl}_3$ ):  $\delta$  1.15 (s, 9H), 1.18 (t, 3H), 2.34 (s, 3H), 3.79 (s, 3H), 3.83 (s, 3H), 3.85 (s, 3H), 4.08-4.22 (m, 2H), 4.73 (d,  $J = 1.2$  Hz, 1H), 5.29 (d,  $J = 2.7$  Hz, 1H), 6.46 (s, 1H);  $^{13}\text{C}$  NMR (100 MHz,  $\text{CDCl}_3$ ):  $\delta$  14.22, 19.97, 22.61, 53.61, 55.76, 55.82, 60.70, 60.98, 61.99, 109.11, 122.28, 132.79, 139.91, 152.28, 153.17, 172.08; ESI-MS ( $m/z$ , %) 388 [ $\text{M}+\text{H}$ ] $^+$ ; ESI-HRMS calcd for  $\text{C}_{18}\text{H}_{30}\text{NO}_6\text{S}$  [ $\text{M}+\text{H}$ ] $^+$  388.1794, found: 388.1791.

HPLC (acetate): 73% de. Chiracel AD-H Column (250 mm); detected at 214 nm; n-hexane / i-propanol = 95 / 5; flow = 0.7 mL / min; Retention time: 27.4 min (maj), 33.8 min.

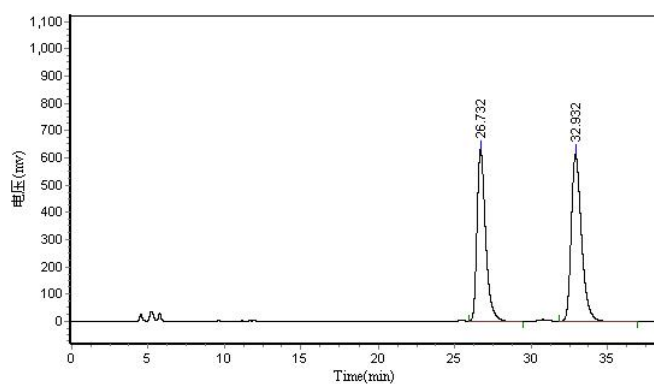

| Results      |         |          |             |              |          |
|--------------|---------|----------|-------------|--------------|----------|
| Peak No.     | Peak ID | Ret Time | Height      | Area         | Conc.    |
| 1            |         | 26.732   | 627613.938  | 24727806.000 | 46.3511  |
| 2            |         | 32.932   | 610408.250  | 28621154.000 | 53.6489  |
| <b>Total</b> |         |          | 1238022.188 | 53348960.000 | 100.0000 |

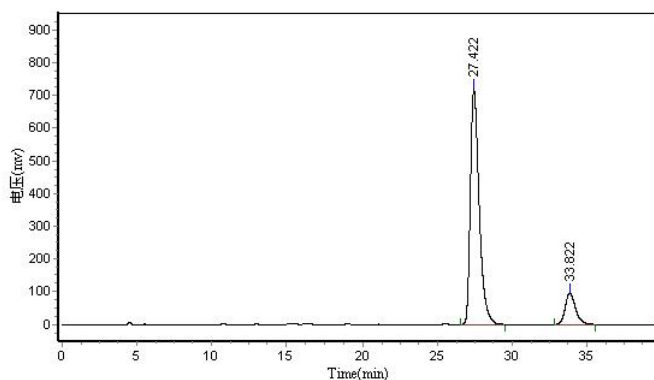

| Results      |         |          |            |              |          |
|--------------|---------|----------|------------|--------------|----------|
| Peak No.     | Peak ID | Ret Time | Height     | Area         | Conc.    |
| 1            |         | 27.422   | 717405.188 | 29391672.000 | 86.4847  |
| 2            |         | 33.822   | 95841.773  | 4593169.000  | 13.5153  |
| <b>Total</b> |         |          | 813246.961 | 33984841.000 | 100.0000 |

(*R*)-ethyl 2-(2,4-dimethoxy-3-methylphenyl)-2-((*R*)-1,1-dimethylethylsulfonamido)acetate (**3i**).

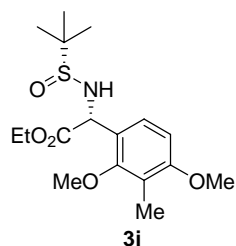

72% yield, yellow oil. <sup>1</sup>H NMR (300 MHz, CDCl<sub>3</sub>): δ 1.16-1.18 (m, 12H), 2.15 (s, 3H), 3.77 (s, 3H), 3.81 (s, 3H), 4.09-4.23 (m, 2H), 4.59 (d, *J* = 3.0 Hz, 1H), 5.27 (d, *J* = 3.9 Hz, 1H), 6.60 (d, *J* = 8.4 Hz, 1H), 7.06 (d, *J* = 8.1 Hz, 1H); <sup>13</sup>C NMR (100 MHz, CDCl<sub>3</sub>): δ 9.56, 14.15, 22.67, 55.09, 55.66, 55.84, 61.55, 62.10, 106.18, 119.99, 123.10, 126.58, 157.46, 159.03, 172.15; ESI-MS (*m/z*, %) 380 [M+Na]<sup>+</sup>; ESI-HRMS calcd for C<sub>17</sub>H<sub>27</sub>NNaO<sub>5</sub>S [M+Na]<sup>+</sup> 380.1508, found 380.1506.

HPLC (**acetate**): 79% de. Chiracel AS-H Column (250 mm); detected at 214 nm; n-hexane / i-propanol = 90 / 10; flow = 0.7 mL / min; Retention time: 29.2 min, 35.4 min (maj).

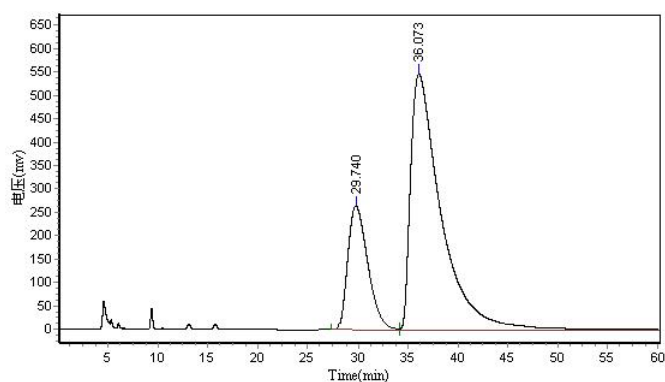

Results

| Peak No.     | Peak ID | Ret Time | Height     | Area          | Conc.    |
|--------------|---------|----------|------------|---------------|----------|
| 1            |         | 29.740   | 264567.031 | 37120236.000  | 24.1669  |
| 2            |         | 36.073   | 546097.250 | 116479080.000 | 75.8331  |
| <b>Total</b> |         |          | 810664.281 | 153599316.000 | 100.0000 |

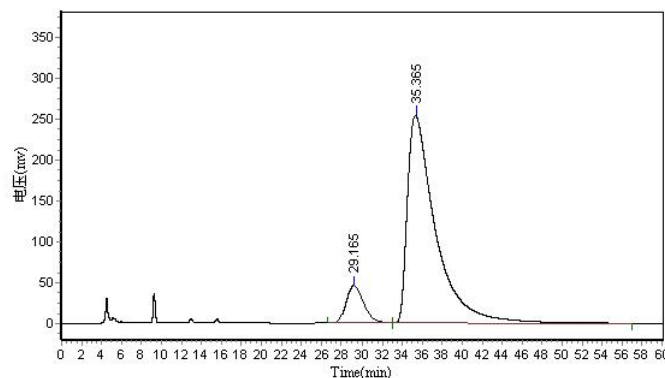

Results

| Peak No.     | Peak ID | Ret Time | Height     | Area         | Conc.    |
|--------------|---------|----------|------------|--------------|----------|
| 1            |         | 29.165   | 45889.371  | 5695477.000  | 10.2159  |
| 2            |         | 35.365   | 253721.891 | 50055768.000 | 89.7841  |
| <b>Total</b> |         |          | 299611.262 | 55751245.000 | 100.0000 |

(*R*)-ethyl 2-((*R*)-1,1-dimethylethylsulfonamido)-2-(4-methoxynaphthalen-1-yl)acetate (**3j**).

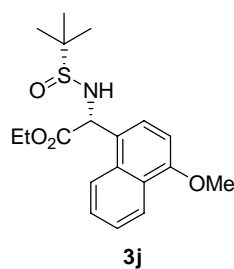

66% yield, white solid.  $^1\text{H}$  NMR (300 MHz,  $\text{CDCl}_3$ ):  $\delta$  1.10 (t, 3H), 1.13 (s, 9H), 4.01 (s, 3H), 4.08-4.21 (m, 2H), 4.66 (s, 1H), 5.50 (s, 1H), 6.76 (d,  $J = 8.1$  Hz, 1H), 7.41 (d,  $J = 8.4$  Hz, 1H), 7.47-7.51 (m, 2H), 7.98 (d,  $J = 7.8$  Hz, 1H), 8.30 (d,  $J = 7.8$  Hz, 1H);  $^{13}\text{C}$  NMR (100 MHz,  $\text{CDCl}_3$ ):  $\delta$  14.08, 22.63, 55.63, 55.79, 59.32, 62.33, 102.97, 122.79, 123.90, 124.34, 125.33, 126.33, 126.95, 128.62, 131.90, 156.24, 172.41; ESI-MS ( $m/z$ , %) 364  $[\text{M}+\text{H}]^+$ ; ESI-HRMS calcd for  $\text{C}_{19}\text{H}_{25}\text{NNaO}_4\text{S}$   $[\text{M}+\text{Na}^+]$  386.1402, found 386.1411.

HPLC (acetate): >99% de. Chiracel AD-H Column (250 mm); detected at 214 nm; n-hexane / i-propanol = 90 / 10; flow = 0.7 mL / min; Retention time: 19.0 min (maj), 24.1 min.

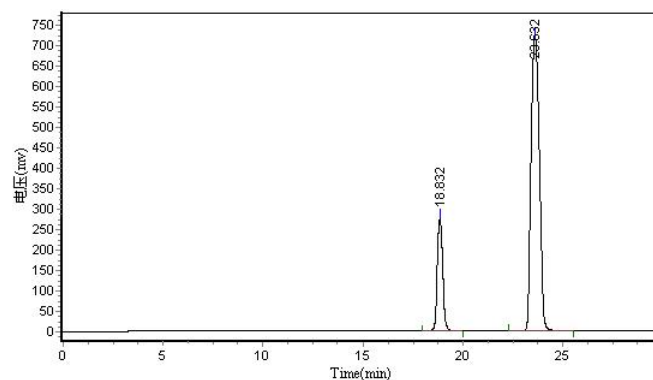

| Results      |         |          |            |              |          |  |
|--------------|---------|----------|------------|--------------|----------|--|
| Peak No.     | Peak ID | Ret Time | Height     | Area         | Conc.    |  |
| 1            |         | 18.832   | 273026.938 | 5296722.500  | 20.1718  |  |
| 2            |         | 23.632   | 720571.500 | 20961286.000 | 79.8282  |  |
| <b>Total</b> |         |          | 993598.438 | 26258008.500 | 100.0000 |  |

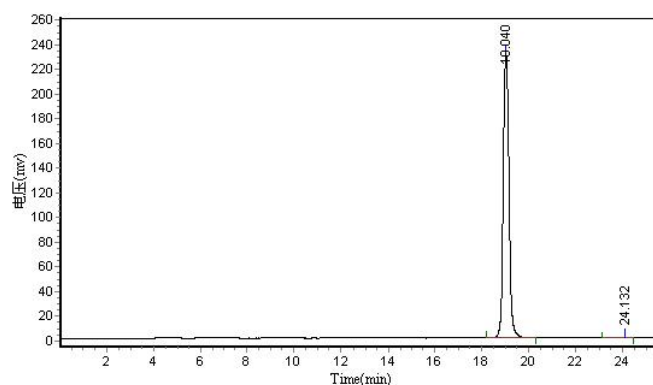

| Results      |         |          |            |             |          |  |
|--------------|---------|----------|------------|-------------|----------|--|
| Peak No.     | Peak ID | Ret Time | Height     | Area        | Conc.    |  |
| 1            |         | 19.040   | 229190.500 | 3953454.250 | 99.7716  |  |
| 2            |         | 24.132   | 148.073    | 6737.400    | 0.1700   |  |
| <b>Total</b> |         |          | 229418.663 | 3962504.750 | 100.0000 |  |

(*R*)-ethyl 2-((*R*)-1,1-dimethylethylsulfonamido)-2-(1-methoxynaphthalen-2-yl)acetate (**3j'**).

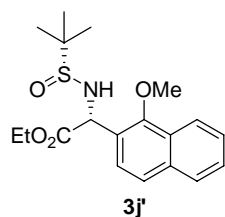

22% yield, white solid.  $^1\text{H}$  NMR (300 MHz,  $\text{CDCl}_3$ ):  $\delta$  1.13 (t, 3H), 1.21 (s, 9H), 4.00 (s, 3H), 4.07-4.21 (m, 2H), 5.73 (d,  $J = 3.9$  Hz, 1H), 6.77 (d,  $J = 7.8$  Hz, 1H), 7.47-7.61 (m, 3H), 8.18 (d,  $J = 8.4$  Hz, 1H), 8.31 (d,  $J = 8.4$  Hz, 1H);  $^{13}\text{C}$  NMR (100 MHz,  $\text{CDCl}_3$ ):  $\delta$  14.12, 22.65, 55.68, 56.46, 56.74, 61.88, 103.27, 122.85, 123.40, 125.06, 125.51, 126.11, 127.19, 127.46, 131.78, 156.21, 172.01; ESI-MS ( $m/z$ , %) 364 [ $\text{M}+\text{H}$ ] $^+$ ; ESI-HRMS calcd for  $\text{C}_{19}\text{H}_{25}\text{NNaO}_4\text{S}$  [ $\text{M}+\text{Na}$ ] $^+$  386.1402, found 386.1390.

HPLC (**acetate**): >99% de. Chiracel AD-H Column (250 mm); detected at 214 nm; n-hexane / i-propanol = 90 / 10; flow = 0.7 mL / min; Retention time: 19.1 min, 23.9 min (maj).

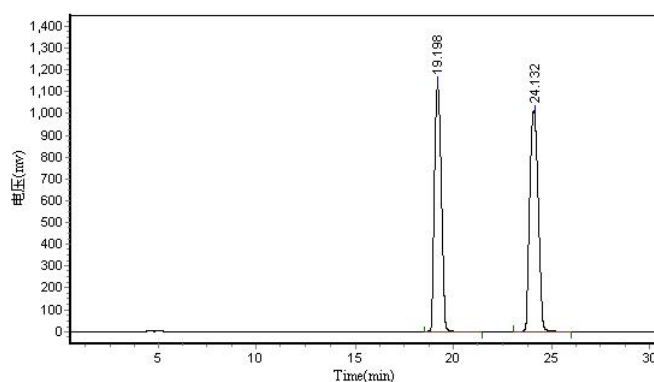

| Results      |         |          |             |              |          |
|--------------|---------|----------|-------------|--------------|----------|
| Peak No.     | Peak ID | Ret Time | Height      | Area         | Conc.    |
| 1            |         | 19.198   | 1123718.875 | 27573620.000 | 47.5011  |
| 2            |         | 24.132   | 1007838.500 | 30474742.000 | 52.4989  |
| <b>Total</b> |         |          | 2131557.375 | 58048362.000 | 100.0000 |

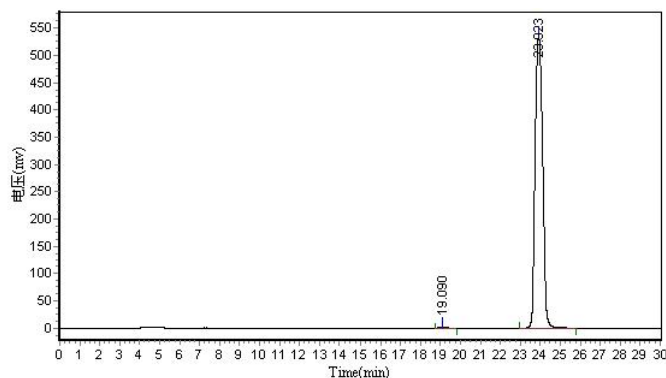

| Results      |         |          |            |              |          |
|--------------|---------|----------|------------|--------------|----------|
| Peak No.     | Peak ID | Ret Time | Height     | Area         | Conc.    |
| 1            |         | 19.090   | 407.462    | 10616.800    | 0.0761   |
| 2            |         | 23.923   | 535504.375 | 13946546.000 | 99.9239  |
| <b>Total</b> |         |          | 535911.837 | 13957162.800 | 100.0000 |

(*R*)-ethyl 2-((*R*)-1,1-dimethylethylsulfonamido)-2-(2-methoxynaphthalen-1-yl)acetate (**3k**).

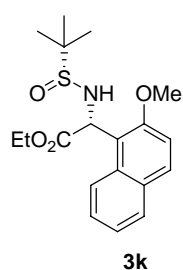

72% yield, white solid. <sup>1</sup>H NMR (300 MHz, CDCl<sub>3</sub>): δ 1.06-1.10 (m, 12H), 3.98 (s, 3H), 4.11-4.18 (m, 2H), 4.76 (s, 1H), 6.10 (s, 1H), 7.28-7.36 (m, 2H), 7.46 (dd, *J* = 8.4 Hz, 7.2 Hz, 1H), 7.78 (d, *J* = 8.1 Hz, 1H), 7.84 (d, *J* = 9.0 Hz, 1H), 7.93 (d, *J* = 9.0 Hz, 1H); <sup>13</sup>C NMR (100 MHz, CDCl<sub>3</sub>): δ 14.14, 22.51, 52.18, 55.69, 57.17, 62.12, 113.67, 118.42, 123.34, 123.76, 127.09, 128.75, 129.47, 130.90, 132.31, 155.83, 172.77; ESI-MS (*m/z*, %) 364 [M+H]<sup>+</sup>; ESI-HRMS calcd for C<sub>19</sub>H<sub>26</sub>NO<sub>4</sub>S [M+H]<sup>+</sup> 364.1582, found: 364.1578.

HPLC (**acetate**): >99% de. Chiracel AD-H Column (250 mm); detected at 214 nm; n-hexane / i-propanol = 90 / 10; flow = 0.7 mL / min; Retention time: 19.3 min (maj), 22.6 min.

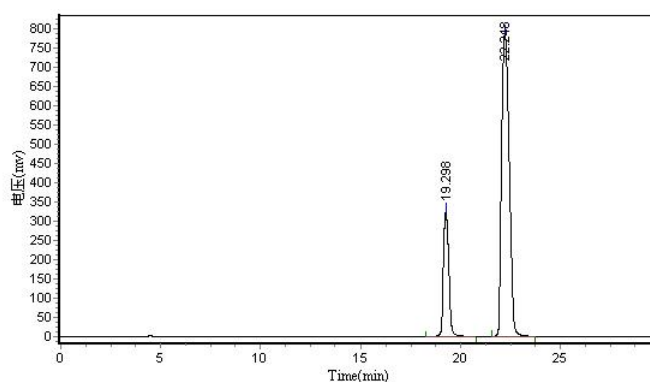

| Results      |         |          |             |              |          |
|--------------|---------|----------|-------------|--------------|----------|
| Peak No.     | Peak ID | Ret Time | Height      | Area         | Conc.    |
| 1            |         | 19.298   | 320611.969  | 6083979.500  | 22.5435  |
| 2            |         | 22.248   | 783896.563  | 20903754.000 | 77.4565  |
| <b>Total</b> |         |          | 1104508.531 | 26987733.500 | 100.0000 |

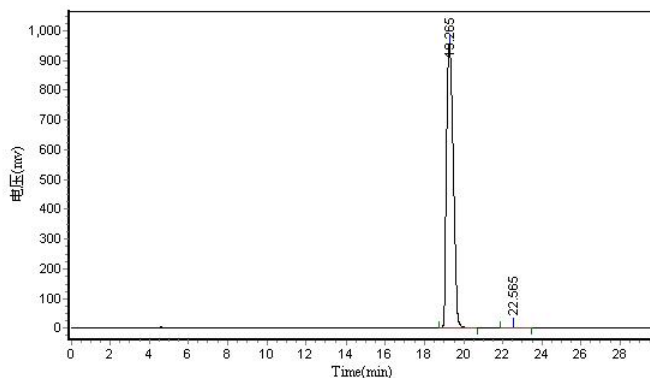

| Results      |         |          |            |              |          |
|--------------|---------|----------|------------|--------------|----------|
| Peak No.     | Peak ID | Ret Time | Height     | Area         | Conc.    |
| 1            |         | 19.265   | 950367.125 | 22983524.000 | 99.8262  |
| 2            |         | 22.565   | 1149.328   | 40010.262    | 0.1738   |
| <b>Total</b> |         |          | 951516.453 | 23023534.262 | 100.0000 |

(*R*)-ethyl 2-((*R*)-1,1-dimethylethylsulfonamido)-2-(4-hydroxynaphthalen-1-yl)acetate (**31**).

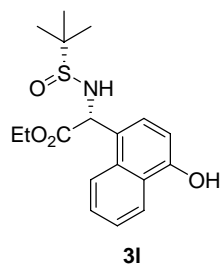

74% yield, yellow solid.  $^1\text{H}$  NMR (300 MHz,  $\text{CDCl}_3$ ):  $\delta$  1.06 (t, 3H), 1.18 (s, 9H), 4.09-4.18 (m, 2H), 4.77 (d,  $J = 2.1$  Hz, 1H), 5.49 (d,  $J = 2.1$  Hz, 1H), 6.78 (d,  $J = 7.8$  Hz, 1H), 7.32 (d,  $J = 7.8$  Hz, 1H), 7.43-7.46 (m, 2H), 7.92-7.96 (m, 1H), 8.18 (s, 1H), 8.28-8.32 (m, 1H);  $^{13}\text{C}$  NMR (100 MHz,  $\text{CDCl}_3$ ):  $\delta$  14.04, 22.74, 56.03, 59.76, 62.42, 107.83, 122.59, 123.16, 123.86, 124.93, 125.69, 126.80, 129.66, 132.14, 153.98, 172.40; ESI-MS ( $m/z$ , %) 350  $[\text{M}+\text{H}]^+$ ; ESI-HRMS calcd for  $\text{C}_{18}\text{H}_{23}\text{NNaO}_4\text{S}$   $[\text{M}+\text{Na}^+]$  372.1246, found 372.1244.

HPLC (acetate): 98% de. Chiracel AD-H Column (250 mm); detected at 214 nm; n-hexane / i-propanol = 90 / 10; flow = 0.7 mL / min; Retention time: 16.2 min (maj), 24.9 min.

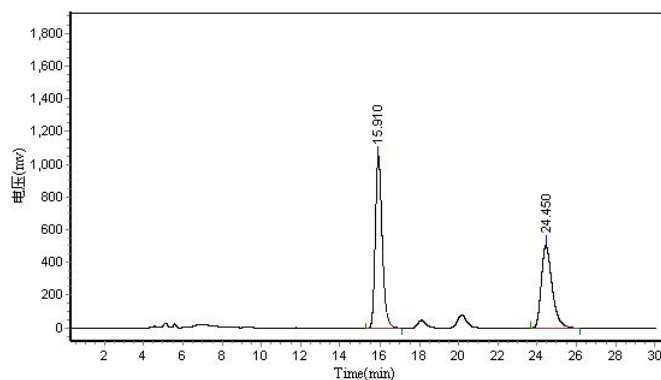

Results

| Peak No.     | Peak ID | Ret Time | Height      | Area         | Conc.    |
|--------------|---------|----------|-------------|--------------|----------|
| 1            |         | 15.910   | 1049745.750 | 25747068.000 | 57.0066  |
| 2            |         | 24.450   | 503980.844  | 19417976.000 | 42.9934  |
| <b>Total</b> |         |          | 1553726.594 | 45165044.000 | 100.0000 |

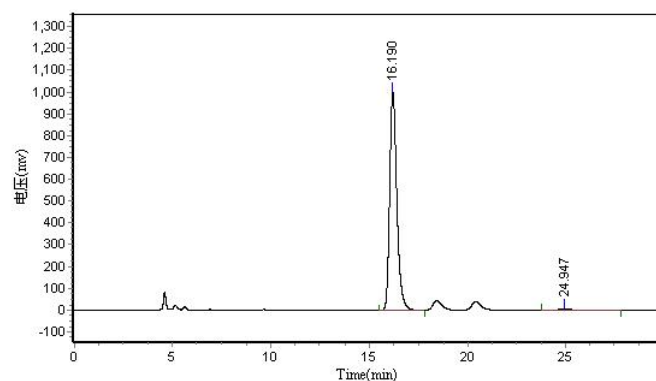

Results

| Peak No.     | Peak ID | Ret Time | Height      | Area         | Conc.    |
|--------------|---------|----------|-------------|--------------|----------|
| 1            |         | 16.190   | 996699.875  | 25443638.000 | 98.9571  |
| 2            |         | 24.947   | 6078.157    | 268154.406   | 1.0429   |
| <b>Total</b> |         |          | 1002778.032 | 25711792.406 | 100.0000 |

(*R*)-ethyl 2-((*R*)-1,1-dimethylethylsulfonamido)-2-(1-hydroxynaphthalen-2-yl)acetate (**31'**).

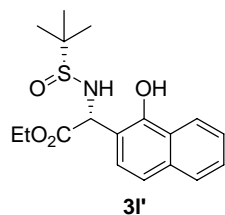

15% yield, yellow solid.  $^1\text{H}$  NMR (300 MHz,  $\text{CDCl}_3$ ):  $\delta$  1.19 (t, 3H), 1.28 (s, 9H), 4.11-4.29 (m, 2H), 4.59 (s, 1H), 5.36 (d,  $J = 2.7$  Hz, 1H), 7.25 (d,  $J = 8.4$  Hz, 1H), 7.39 (d,  $J = 8.7$  Hz, 1H), 7.45-7.52 (m, 2H), 7.76-7.79 (m, 1H), 8.26-8.30 (m, 2H);  $^{13}\text{C}$  NMR (100 MHz,  $\text{CDCl}_3$ ):  $\delta$  14.11, 22.68, 56.53, 57.25, 62.76, 114.46, 120.34, 122.67, 125.57, 126.79, 127.07, 127.51, 134.83, 151.71, 171.29; ESI-MS ( $m/z$ , %) 372 [ $\text{M}+\text{Na}$ ] $^+$ ; ESI-HRMS calcd for  $\text{C}_{18}\text{H}_{23}\text{NNaO}_4\text{S}$  [ $\text{M}+\text{Na}$ ] $^+$  372.1246, found 372.1253.

HPLC (**acetate**): 97% de. Chiracel AD-H Column (250 mm); detected at 214 nm; n-hexane / i-propanol = 90 / 10; flow = 0.7 mL / min; Retention time: 21.4 min, 24.7 min (maj).

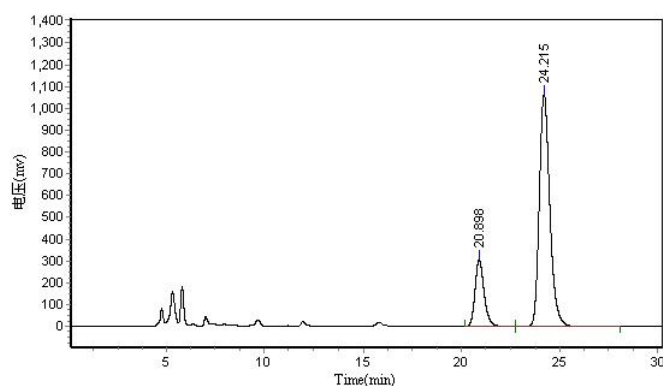

| Results      |         |          |             |              |          |
|--------------|---------|----------|-------------|--------------|----------|
| Peak No.     | Peak ID | Ret Time | Height      | Area         | Conc.    |
| 1            |         | 20.898   | 306281.656  | 9774731.000  | 19.7613  |
| 2            |         | 24.215   | 1063924.750 | 39689376.000 | 80.2387  |
| <b>Total</b> |         |          | 1370206.406 | 49464107.000 | 100.0000 |

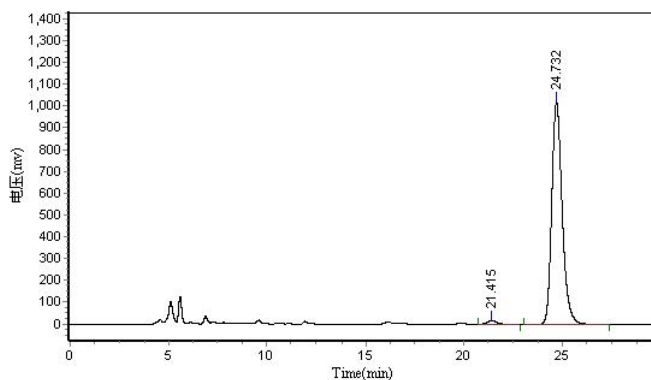

| Results      |         |          |             |              |          |
|--------------|---------|----------|-------------|--------------|----------|
| Peak No.     | Peak ID | Ret Time | Height      | Area         | Conc.    |
| 1            |         | 21.415   | 15704.157   | 495847.688   | 1.3039   |
| 2            |         | 24.732   | 1017129.375 | 37533068.000 | 98.6961  |
| <b>Total</b> |         |          | 1032833.532 | 38028915.688 | 100.0000 |



(*R*)-ethyl 2-((*R*)-1,1-dimethylethylsulfonamido)-2-(2-hydroxynaphthalen-1-yl)acetate (**3m**).

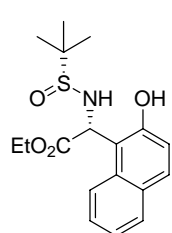

**3m**

70% yield, yellow solid.  $^1\text{H}$  NMR (300 MHz,  $\text{CDCl}_3$ ):  $\delta$  1.05 (t, 3H), 1.21 (s, 9H), 4.05-4.18 (m, 2H), 4.82 (s, 1H), 6.22 (s, 1H), 7.17 (d,  $J = 8.7$  Hz, 1H), 7.26 (dd,  $J = 6.6$  Hz, 8.4 Hz, 1H), 7.39 (dd,  $J = 8.4$  Hz, 7.2 Hz, 1H), 7.67-7.74 (dd,  $J = 8.7$  Hz, 8.4 Hz, 2H), 7.80 (d,  $J = 8.4$  Hz, 1H), 9.55 (br, 1H);  $^{13}\text{C}$  NMR (100 MHz,  $\text{CDCl}_3$ ):  $\delta$  14.07, 22.72, 52.00, 55.76, 62.32, 112.46, 118.40, 122.77, 122.90, 126.69, 128.74, 128.95, 130.81, 132.61, 155.18, 173.00; ESI-MS ( $m/z$ , %) 372 [ $\text{M}+\text{Na}$ ] $^+$ ; ESI-HRMS calcd for  $\text{C}_{18}\text{H}_{23}\text{NNaO}_4\text{S}$  [ $\text{M}+\text{Na}$ ] $^+$  372.1246, found 372.1246.

HPLC (acetate): 98% de. Chiracel AD-H Column (250 mm); detected at 214 nm; n-hexane / i-propanol = 95 / 5; flow = 0.7 mL / min; Retention time: 43.4 min (maj), 47.4 min.

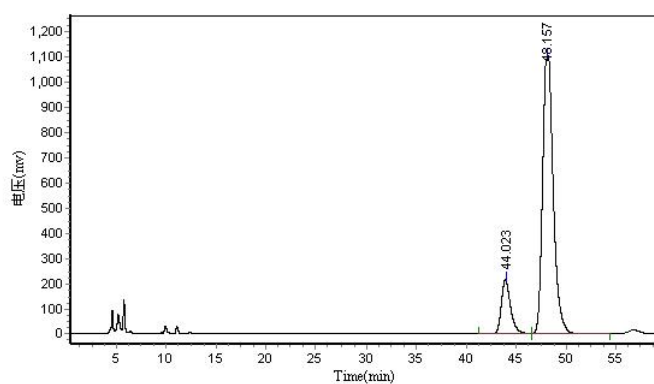

Results

| Peak No.     | Peak ID | Ret Time | Height      | Area         | Conc.    |
|--------------|---------|----------|-------------|--------------|----------|
| 1            |         | 44.023   | 213212.313  | 13811243.000 | 14.4132  |
| 2            |         | 48.157   | 1090117.125 | 82012416.000 | 85.5868  |
| <b>Total</b> |         |          | 1303329.438 | 95823659.000 | 100.0000 |

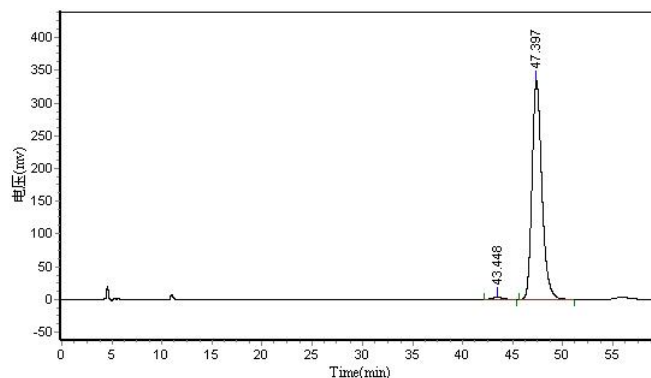

Results

| Peak No.     | Peak ID | Ret Time | Height     | Area         | Conc.    |
|--------------|---------|----------|------------|--------------|----------|
| 1            |         | 43.448   | 3228.474   | 208958.484   | 0.9039   |
| 2            |         | 47.397   | 334161.000 | 22907366.000 | 99.0961  |
| <b>Total</b> |         |          | 337389.474 | 23116324.484 | 100.0000 |

(*R*)-ethyl 2-(2,7-dimethoxynaphthalen-1-yl)-2-((*R*)-1,1-dimethylethylsulfonamido)acetate (**3n**).

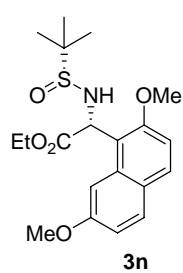

74% yield, white solid. <sup>1</sup>H NMR (300 MHz, CDCl<sub>3</sub>): δ 1.05-1.24 (m, 12H), 3.86 (s, 3H), 3.95 (s, 3H), 4.10-4.17 (m, 2H), 4.71 (s, 1H), 6.06 (s, 1H), 6.96-7.00 (dd, *J* = 1.5 Hz, 8.7 Hz, 1H), 7.11 (d, *J* = 8.7 Hz, 1H), 7.25 (d, *J* = 1.5 Hz, 1H), 7.64 (d, *J* = 9.3 Hz, 1H), 7.738 (d, *J* = 6.9 Hz, 1H); <sup>13</sup>C NMR (100 MHz, CDCl<sub>3</sub>): δ 14.16, 14.29, 22.55, 52.14, 55.33, 55.57, 57.00, 62.09, 101.66, 110.87, 116.61, 124.82, 130.20, 130.53, 133.79, 156.50, 158.59, 172.88; ESI-MS (*m/z*, %) 416 [M+Na]<sup>+</sup>; ESI-HRMS calcd for C<sub>20</sub>H<sub>27</sub>NNaO<sub>5</sub>S [M+Na<sup>+</sup>] 416.1508, found 416.1516.

HPLC (**acetate**): 98% de. Chiracel AD-H Column (250 mm); detected at 214 nm; n-hexane / i-propanol = 90 / 10; flow = 0.7 mL / min; Retention time: 15.4 min (maj), 17.6 min.

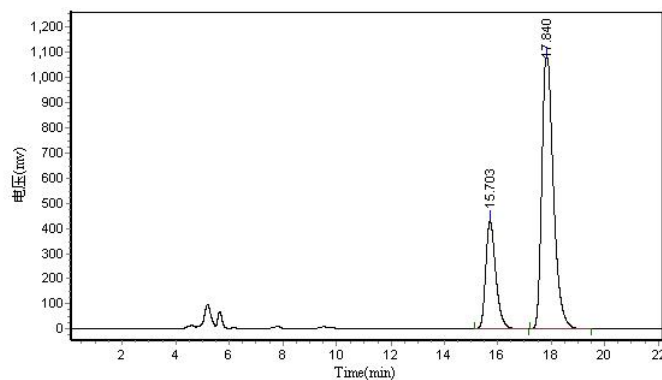

| Results      |         |          |             |              |          |
|--------------|---------|----------|-------------|--------------|----------|
| Peak No.     | Peak ID | Ret Time | Height      | Area         | Conc.    |
| 1            |         | 15.703   | 429111.094  | 11110039.000 | 25.3948  |
| 2            |         | 17.840   | 1077589.375 | 32639272.000 | 74.6052  |
| <b>Total</b> |         |          | 1506700.469 | 43749311.000 | 100.0000 |

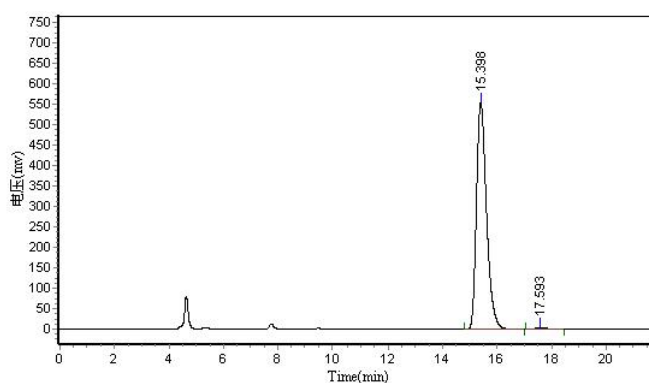

| Results      |         |          |            |              |          |
|--------------|---------|----------|------------|--------------|----------|
| Peak No.     | Peak ID | Ret Time | Height     | Area         | Conc.    |
| 1            |         | 15.398   | 555048.375 | 14239966.000 | 99.1422  |
| 2            |         | 17.593   | 4385.118   | 123213.297   | 0.8578   |
| <b>Total</b> |         |          | 559433.493 | 14363179.297 | 100.0000 |

(*R*)-ethyl 2-((*R*)-1,1-dimethylethylsulfonamido)-2-(5-methylfuran-2-yl)acetate (**3o**).

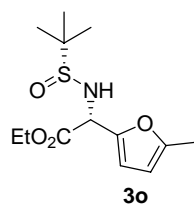

90% yield, colorless oil.  $^1\text{H}$  NMR (300 MHz,  $\text{CDCl}_3$ ):  $\delta$  1.22 (s, 9H), 1.25 (t, 3H), 2.25 (s, 3H), 4.19-4.28 (m, 2H), 4.41 (d,  $J = 4.8$  Hz, 1H), 5.03 (d,  $J = 5.4$  Hz, 1H), 5.91 (s, 1H), 6.18 (s, 1H);  $^{13}\text{C}$  NMR (100 MHz,  $\text{CDCl}_3$ ):  $\delta$  13.07, 14.13, 22.57, 55.36, 56.23, 62.52, 106.53, 109.86, 147.66, 153.04, 169.70; ESI-MS ( $m/z$ , %) 310 [ $\text{M}+\text{Na}$ ] $^+$ ; ESI-HRMS calcd for  $\text{C}_{13}\text{H}_{21}\text{NNaO}_4\text{S}$  [ $\text{M}+\text{Na}$ ] $^+$  310.1089, found 310.1094.

HPLC (acetate): 90% de. Chiracel AD-H Column (250 mm); detected at 214 nm; n-hexane / i-propanol = 95 / 5; flow = 0.7 mL / min; Retention time: 20.8 min (maj), 26.1 min.

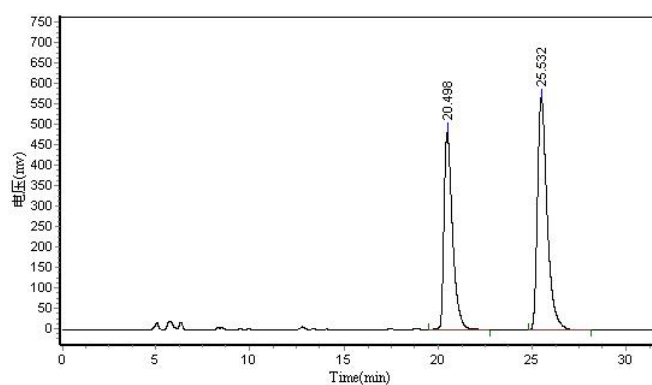

| Results      |         |          |             |              |          |
|--------------|---------|----------|-------------|--------------|----------|
| Peak No.     | Peak ID | Ret Time | Height      | Area         | Conc.    |
| 1            |         | 20.498   | 482514.063  | 15349944.000 | 42.8937  |
| 2            |         | 25.532   | 567307.625  | 20436054.000 | 57.1063  |
| <b>Total</b> |         |          | 1050021.688 | 35785998.000 | 100.0000 |

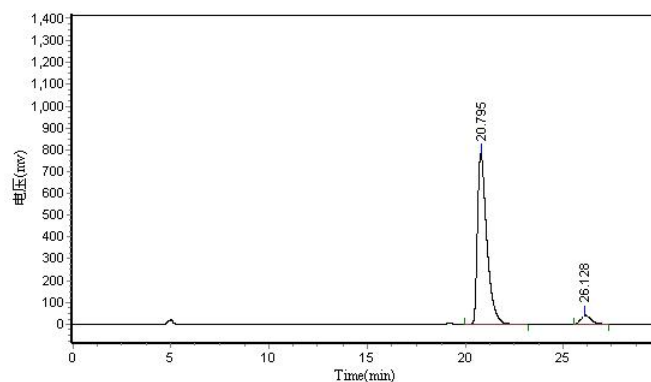

| Results      |         |          |            |              |          |
|--------------|---------|----------|------------|--------------|----------|
| Peak No.     | Peak ID | Ret Time | Height     | Area         | Conc.    |
| 1            |         | 20.795   | 782548.563 | 26013320.000 | 94.9549  |
| 2            |         | 26.128   | 40046.980  | 1382126.250  | 5.0451   |
| <b>Total</b> |         |          | 822595.543 | 27395446.250 | 100.0000 |

(*R*)-ethyl 2-((*R*)-1,1-dimethylethylsulfonamido)-2-(5-methylthiophen-2-yl)acetate (**3p**).

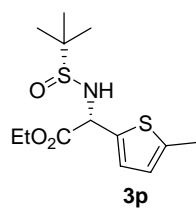

74% yield, colorless oil. <sup>1</sup>H NMR (300 MHz, CDCl<sub>3</sub>): δ 1.26 (m, 12H), 2.44 (s, 3H), 4.18-4.28 (m, 2H), 4.57 (d, *J* = 4.8 Hz, 1H), 5.20 (d, *J* = 4.8 Hz, 1H), 6.60-6.61 (m, 1H), 6.84 (d, *J* = 3.3 Hz, 1H); <sup>13</sup>C NMR (100 MHz, CDCl<sub>3</sub>): δ 14.14, 15.54, 22.73, 56.35, 56.95, 62.60, 125.18, 126.38, 137.78, 140.82, 170.57; ESI-MS (*m/z*, %) 326 [M+Na]<sup>+</sup>; ESI-HRMS calcd for C<sub>13</sub>H<sub>21</sub>NNaO<sub>3</sub>S<sub>2</sub> [M+Na]<sup>+</sup> 326.0860, found 326.0862.

HPLC (acetate): 79% de. Chiracel AD-H Column (250 mm); detected at 214 nm; n-hexane / i-propanol = 90 / 10; flow = 0.7 mL / min; Retention time: 29.4 min (maj), 33.6 min.

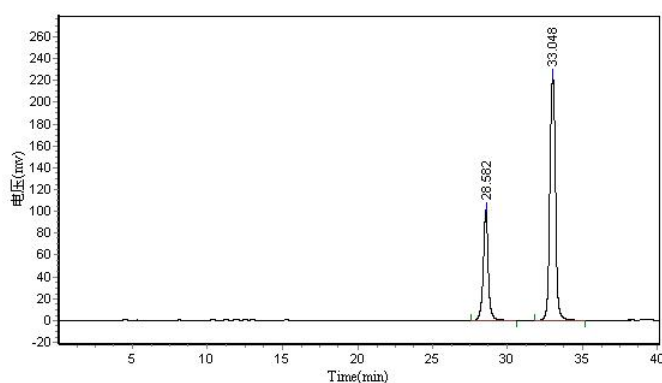

Results

| Peak No.     | Peak ID | Ret Time | Height     | Area        | Conc.    |
|--------------|---------|----------|------------|-------------|----------|
| 1            |         | 28.582   | 100177.695 | 2339595.750 | 28.4702  |
| 2            |         | 33.048   | 222872.891 | 5878101.000 | 71.5298  |
| <b>Total</b> |         |          | 323050.586 | 8217696.750 | 100.0000 |

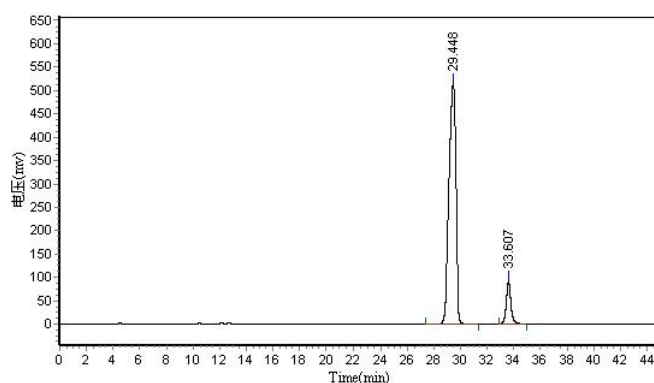

Results

| Peak No.     | Peak ID | Ret Time | Height     | Area         | Conc.    |
|--------------|---------|----------|------------|--------------|----------|
| 1            |         | 29.448   | 515467.469 | 18963830.000 | 89.4490  |
| 2            |         | 33.607   | 91384.148  | 2236887.750  | 10.5510  |
| <b>Total</b> |         |          | 606851.617 | 21200717.750 | 100.0000 |

### 5. General procedure for the synthesis of the chiral Friedel-Crafts dialkylation product (4).

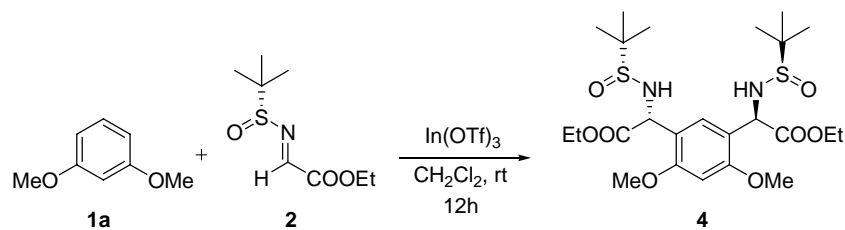

Under nitrogen atmosphere, In(OTf)<sub>3</sub> (0.25 mmol, 1equiv) was placed into a glass reaction vessel, glyoxylate imine **2** (0.25 mmol) in 2 mL of dry CH<sub>2</sub>Cl<sub>2</sub> and arene **1** (0.125 mmol) were added successively. The mixture was stirred at room temperature and monitored by TLC. When the reaction was over, a saturated aq. NH<sub>4</sub>Cl was added and the mixture was extracted with CH<sub>2</sub>Cl<sub>2</sub> (10 mL×3). The combined organic phase was dried over Na<sub>2</sub>SO<sub>4</sub>, filtered, and concentrated. The residue was purified by silica gel flash chromatography to afford the corresponding product **4**.

## 6. Characterization and HPLC of the chiral Friedel-Crafts dialkylation product (4).

(2R,2'R,26R)-diethyl-2,2'-(4,6-dimethoxy-1,3-phenylene)bis(2-((R)-1,1-dimethylethylsulfinamido)acetate) (4).

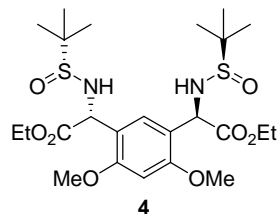

43% yield, colorless oil. <sup>1</sup>H NMR (300 MHz, CDCl<sub>3</sub>): δ 1.14-1.20 (m, 24H), 3.85 (s, 6H), 4.08-4.21 (m, 4H), 4.51 (d, *J* = 4.2 Hz, 2H), 5.29 (d, *J* = 4.2 Hz, 2H), 6.44 (s, 1H), 7.07 (s, 1H); <sup>13</sup>C NMR (100 MHz, CDCl<sub>3</sub>): δ 14.17, 22.58, 55.00, 55.87, 55.90, 61.94, 95.56, 118.29, 129.81, 158.38, 171.73; ESI-MS (*m/z*, %) 549 [M+H]<sup>+</sup>; ESI-HRMS calcd for C<sub>24</sub>H<sub>40</sub>N<sub>2</sub>NaO<sub>8</sub>S<sub>2</sub> [M+Na]<sup>+</sup> 571.2124, found 571.2133.

HPLC (sulfonate): >99% de. Chiralcel AD-H Column (250 mm); detected at 214 nm; n-hexane / i-propanol = 70 / 30; flow = 0.7 mL / min; Retention time: 17.4 min (maj), 23.7 min.

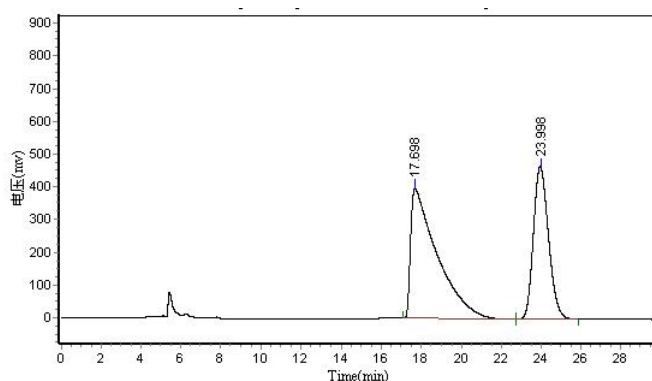

Results

| Peak No.     | Peak ID | Ret Time | Height     | Area         | Conc.    |
|--------------|---------|----------|------------|--------------|----------|
| 1            |         | 17.698   | 399575.188 | 37348212.000 | 60.1960  |
| 2            |         | 23.998   | 465545.938 | 24696174.000 | 39.8040  |
| <b>Total</b> |         |          | 865121.125 | 62044386.000 | 100.0000 |

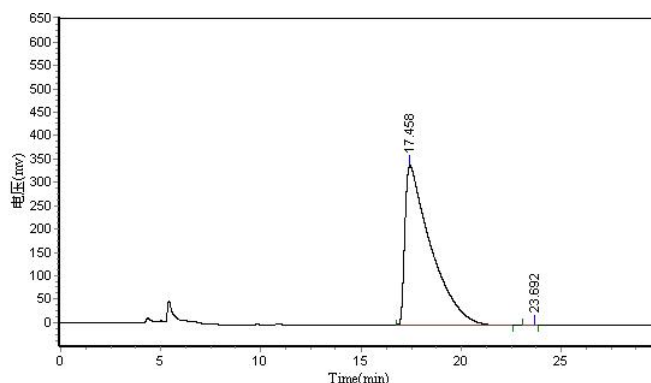

Results

| Peak No.     | Peak ID | Ret Time | Height     | Area         | Conc.    |
|--------------|---------|----------|------------|--------------|----------|
| 1            |         | 17.458   | 341869.594 | 30839148.000 | 99.9964  |
| 2            |         | 23.692   | 39.592     | 1116.209     | 0.0036   |
| <b>Total</b> |         |          | 341909.186 | 30890264.209 | 100.0000 |

## 7. The synthesis and HPLC of (*R*)-2-(chloroamino)-2-(2,4-dimethoxyphenyl)acetic acid (*R*)-5).

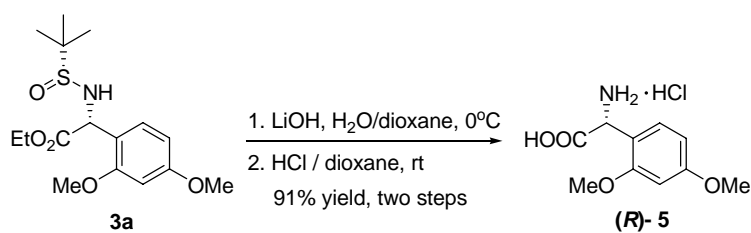

To a round bottomed flask containing LiOH (37.8 mg, 0.9mmol, 10 equiv) was added distilled H<sub>2</sub>O (5.0 mL), and the resulting solution was cooled to 0 °C. A solution of **3a** (30.0 mg, 0.09 mmol, 1.0 equiv) in dioxane (5.0 mL) was cannulated into the reaction flask. The resulting solution was stirred at 0 °C for 3 h. The reaction mixture was then concentrated to remove the dioxane, and the remaining material was diluted with distilled H<sub>2</sub>O (3 mL) and EtOAc (3 mL) and placed in a separatory funnel. 1 N NaHSO<sub>4</sub> (2 mL) was added and the aqueous layer was extracted with EtOAc (5×4 mL). The combined organic layers were dried over Na<sub>2</sub>SO<sub>4</sub>, filtered, and concentrated under reduced pressure. The crude product was isolated with no further purification as a white solid. Subsequently, the crude product was treated with 5 mL solution of dry HCl in 1, 4-dioxane at room temperature for 1 h. The reaction mixture was concentrated *en vacuo*, and the amine hydrochloride was precipitated with dry diethyl ether. The precipitate was collected by filtration and washed with diethyl ether to yield the (*R*)-5 (20 mg, 91% yield) as a white solid.

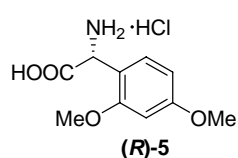

91% yield, white solid.  $[\alpha]_D^{20} = -111.2$  (*c* 0.5, MeOH); The absolute configuration was determined to be (*R*) according to literature [ $lit^1[\alpha]_D^{22} = +106.6$  (*c* 1.0 MeOH)]. <sup>1</sup>H NMR (300 MHz, CD<sub>3</sub>OD):  $\delta$  3.83 (s, 3H), 3.88 (s, 3H), 5.10 (s, 1H), 6.58-6.61 (dd, *J* = 2.4 Hz, 8.4 Hz, 1H), 6.64 (d, *J* = 2.1 Hz, 1H), 7.27 (d, *J* = 8.4 Hz, 1H); <sup>13</sup>C NMR (100 MHz, CD<sub>3</sub>OD):  $\delta$  53.75, 56.06, 56.24, 99.73, 106.42, 114.21, 132.48, 159.90, 164.16, 171.17.

Ref 1: D. Enders, M. Seppelt, and T. Beck, *Adv. Synth. Catal.*, 2010, **352**, 1413.

### 8. Copies of $^1\text{H}$ and $^{13}\text{C}$ NMR Spectra of Compounds 3a-p, 4 and (R)-5.

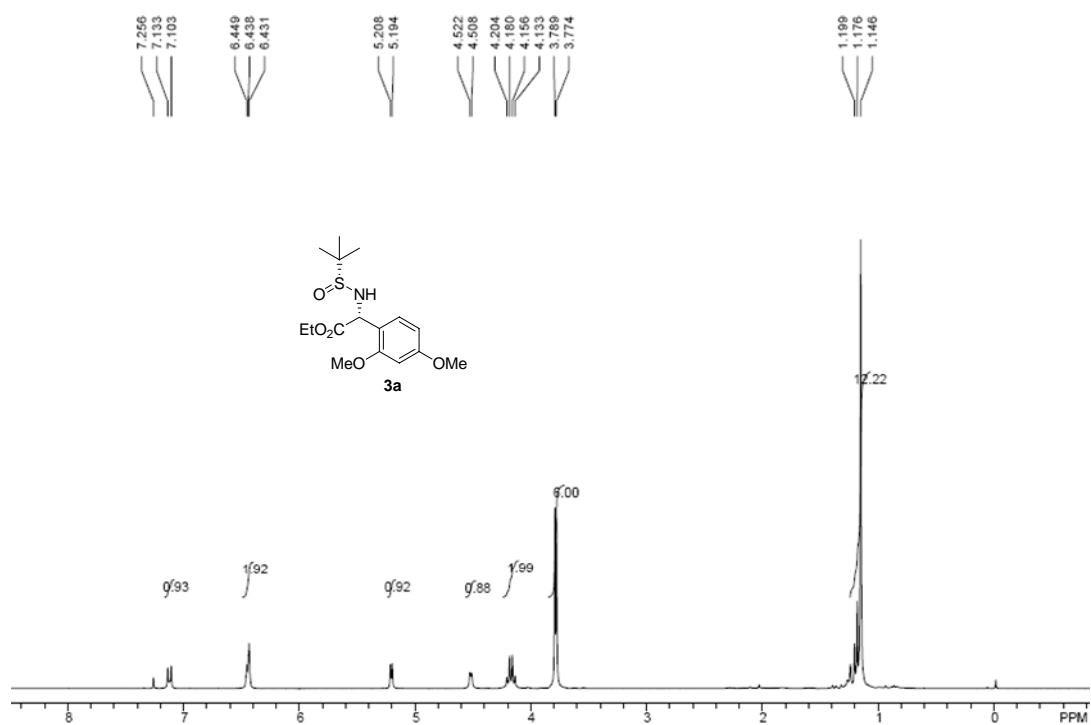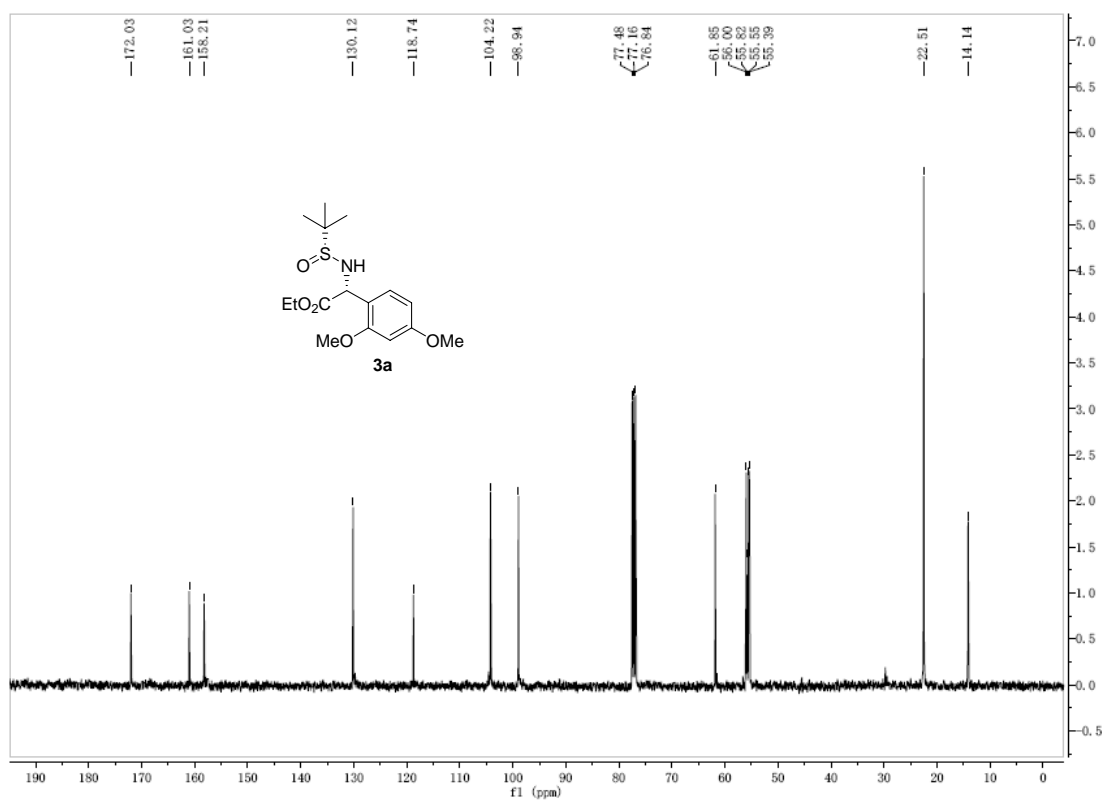



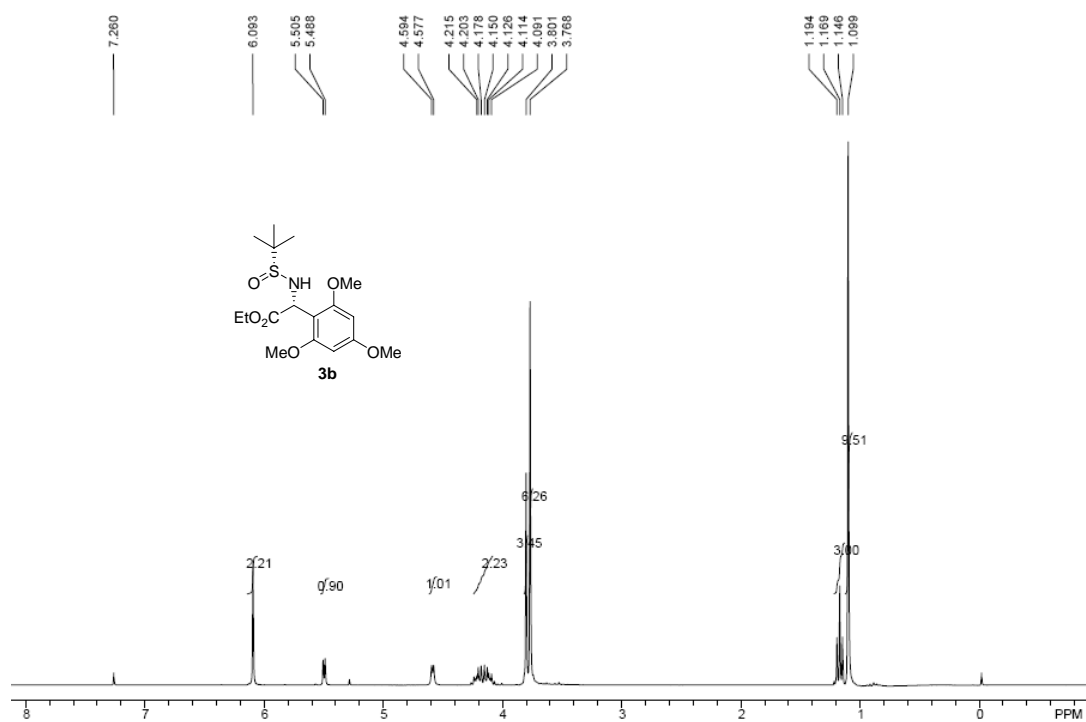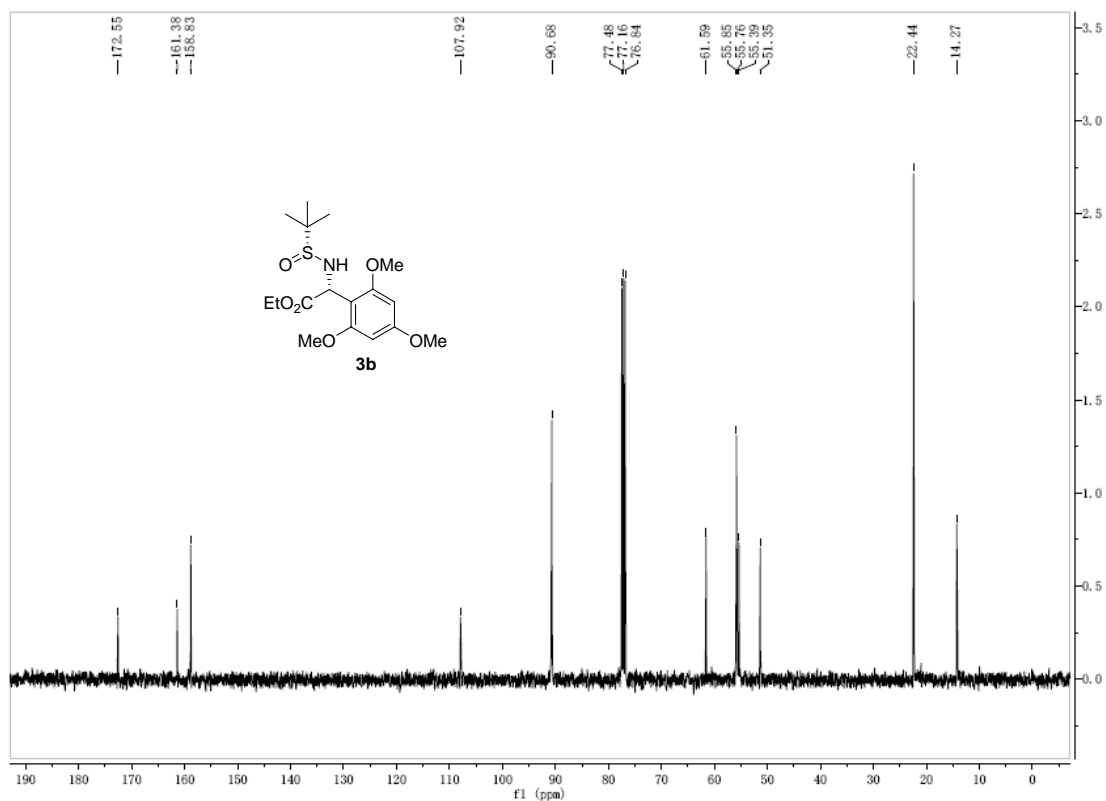

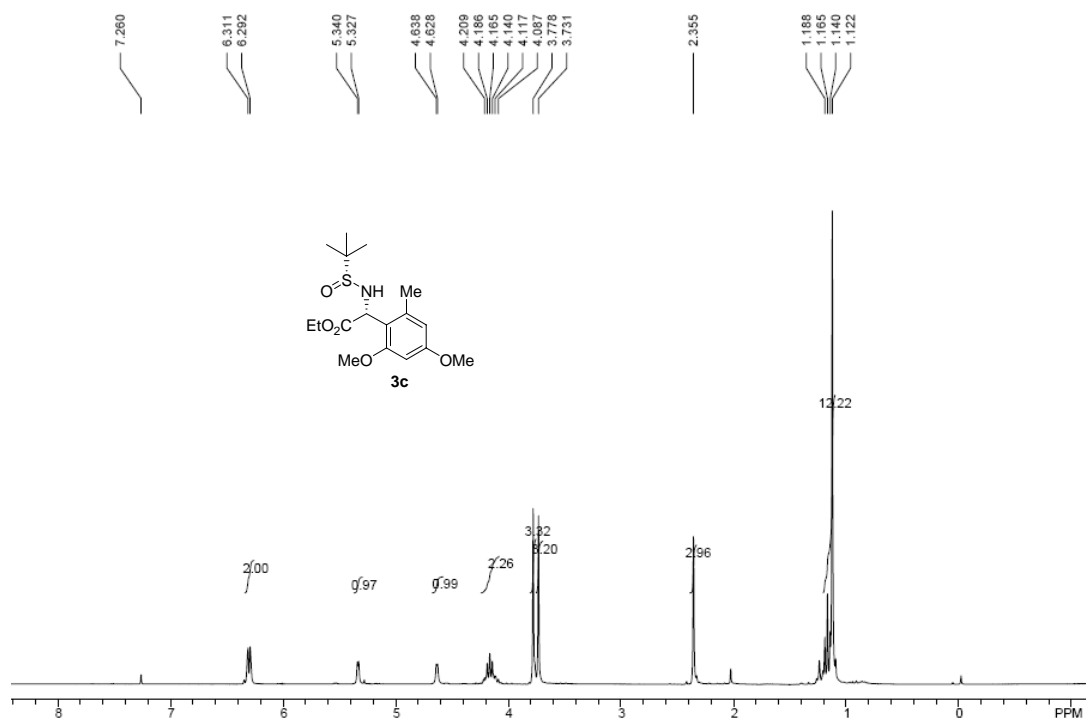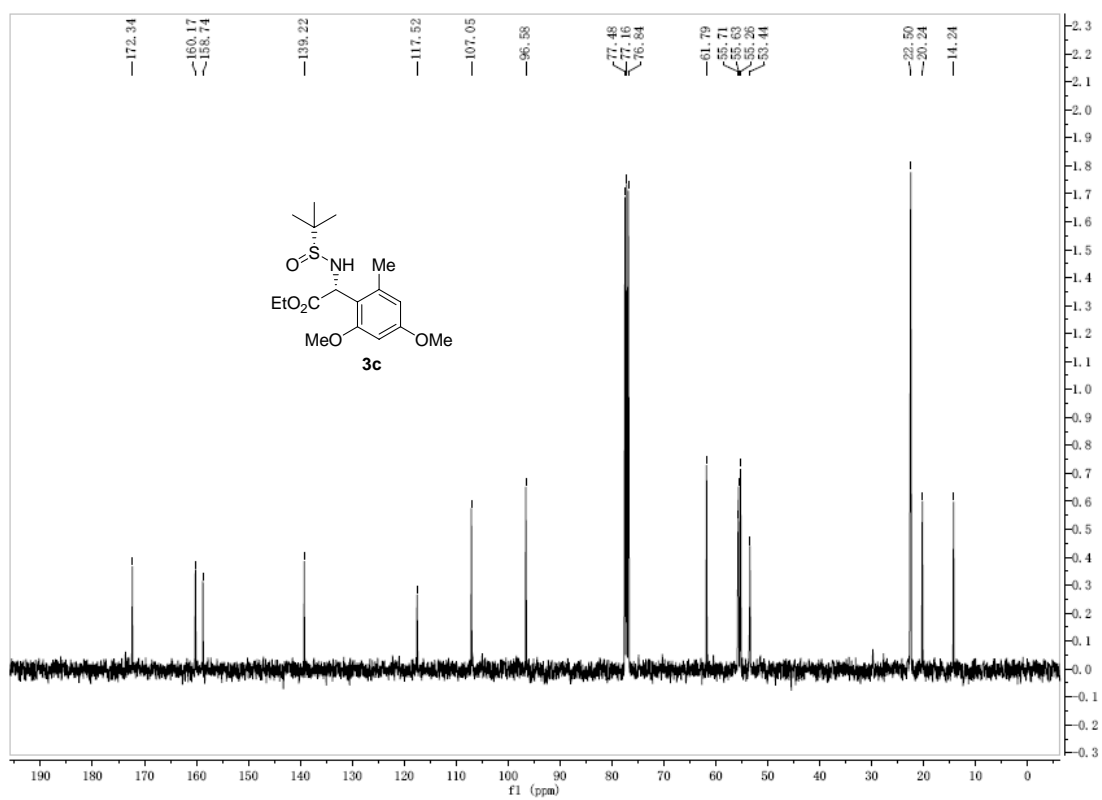

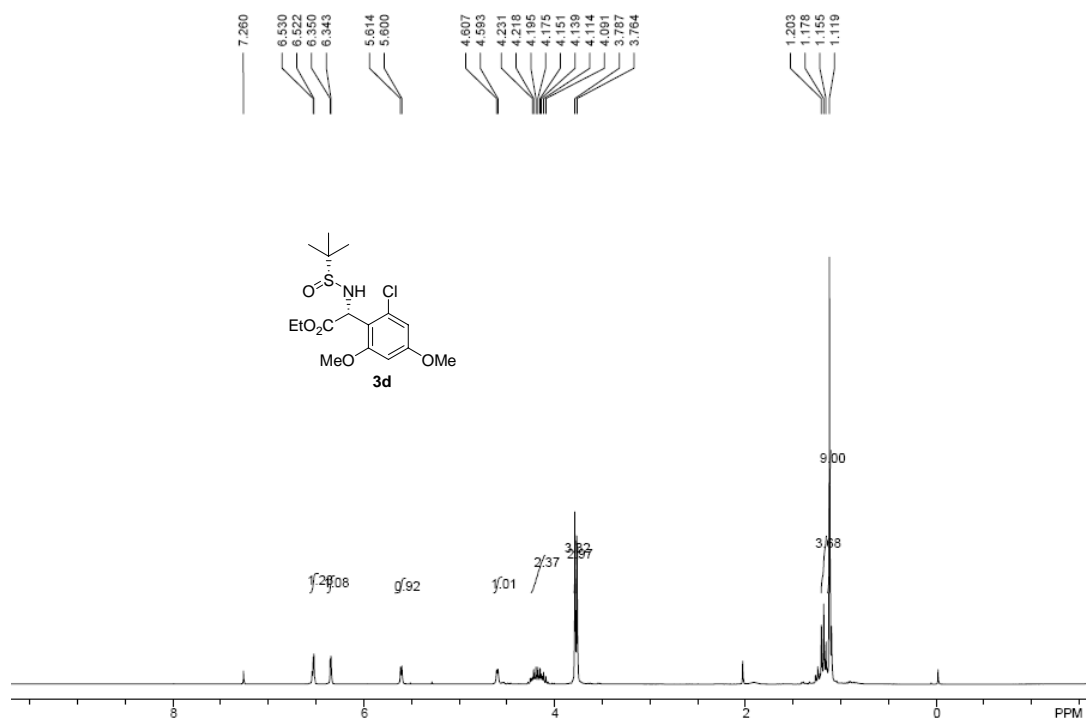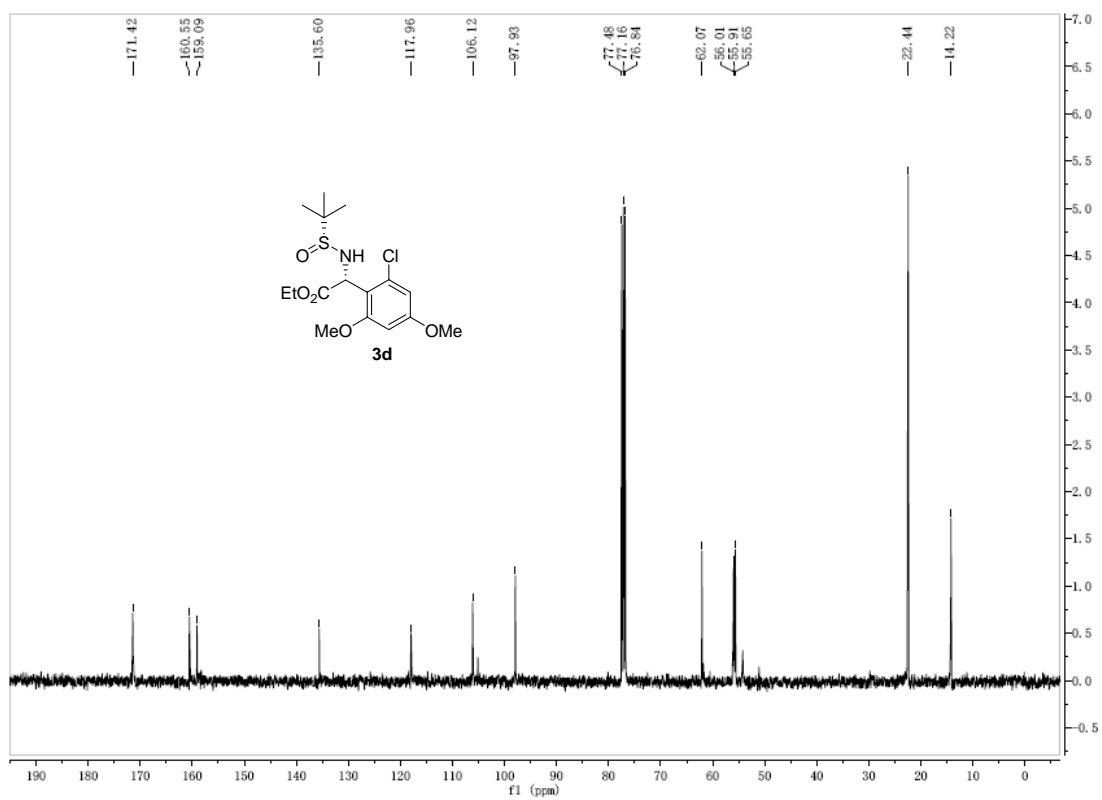

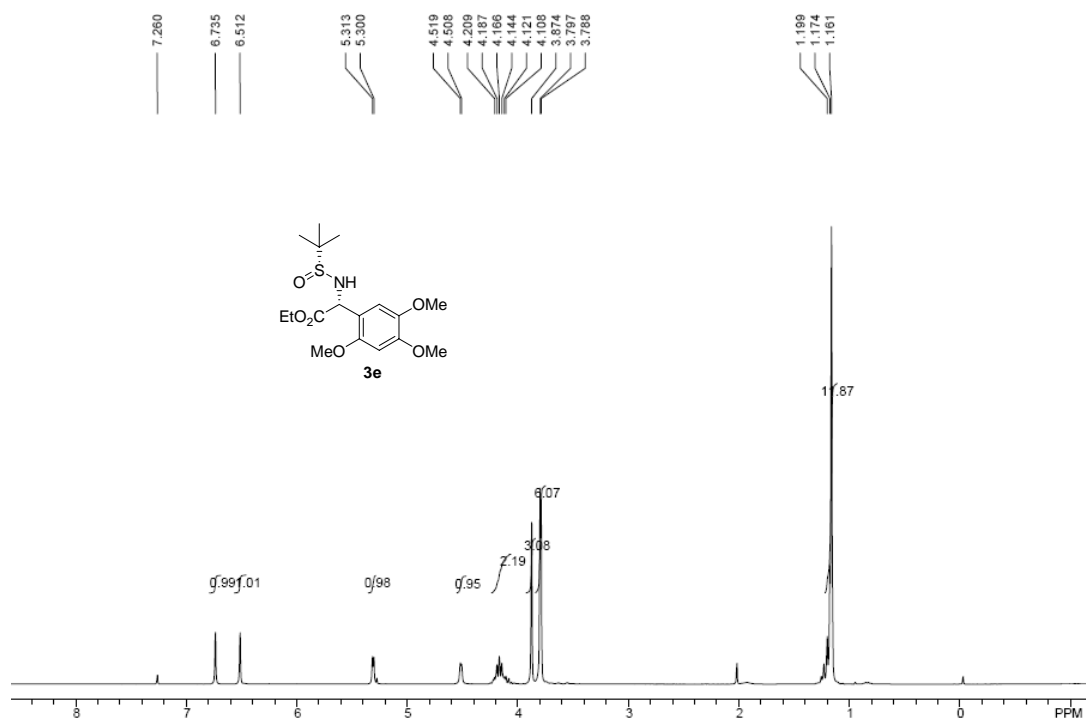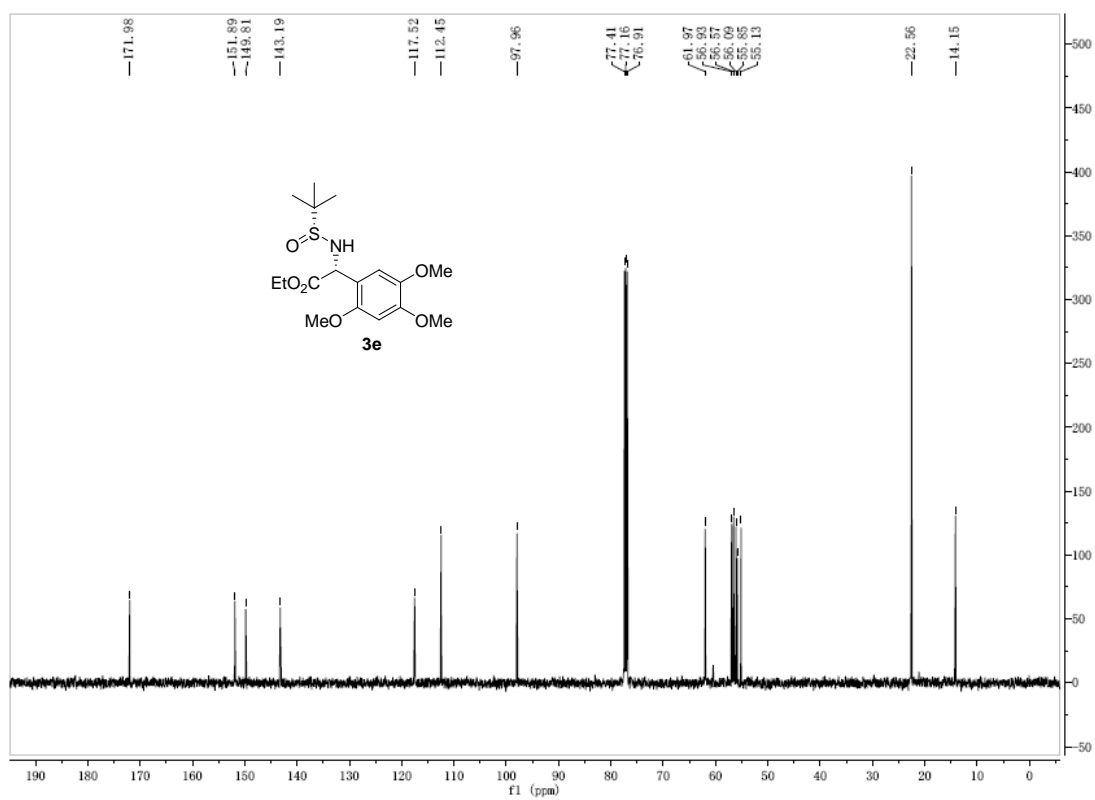

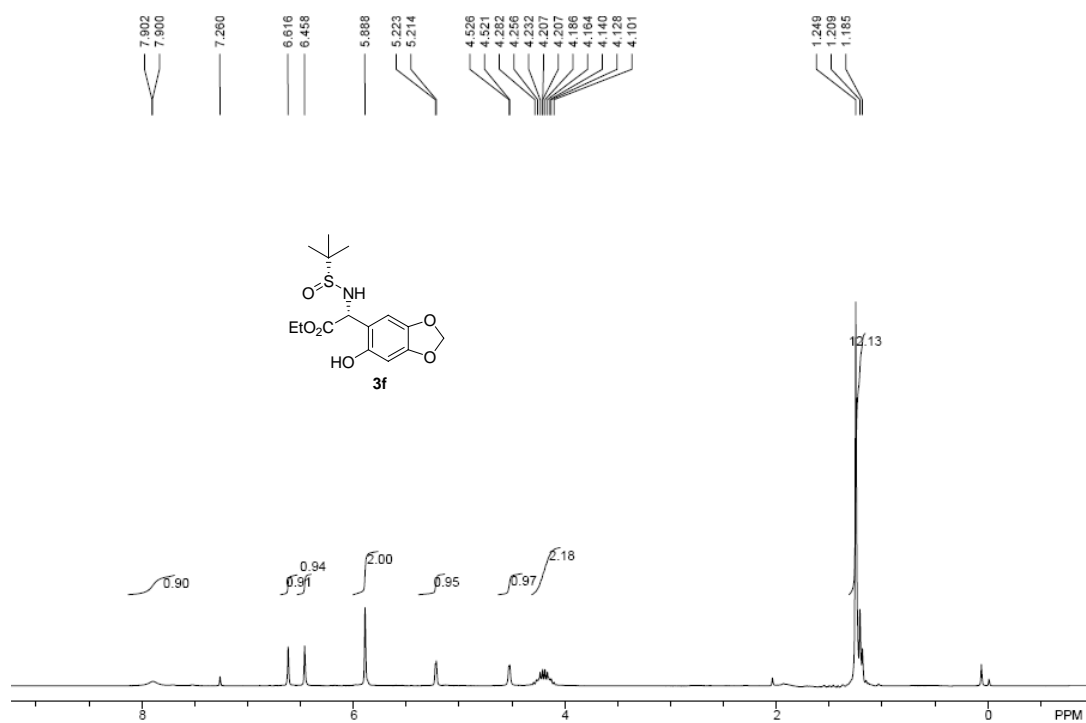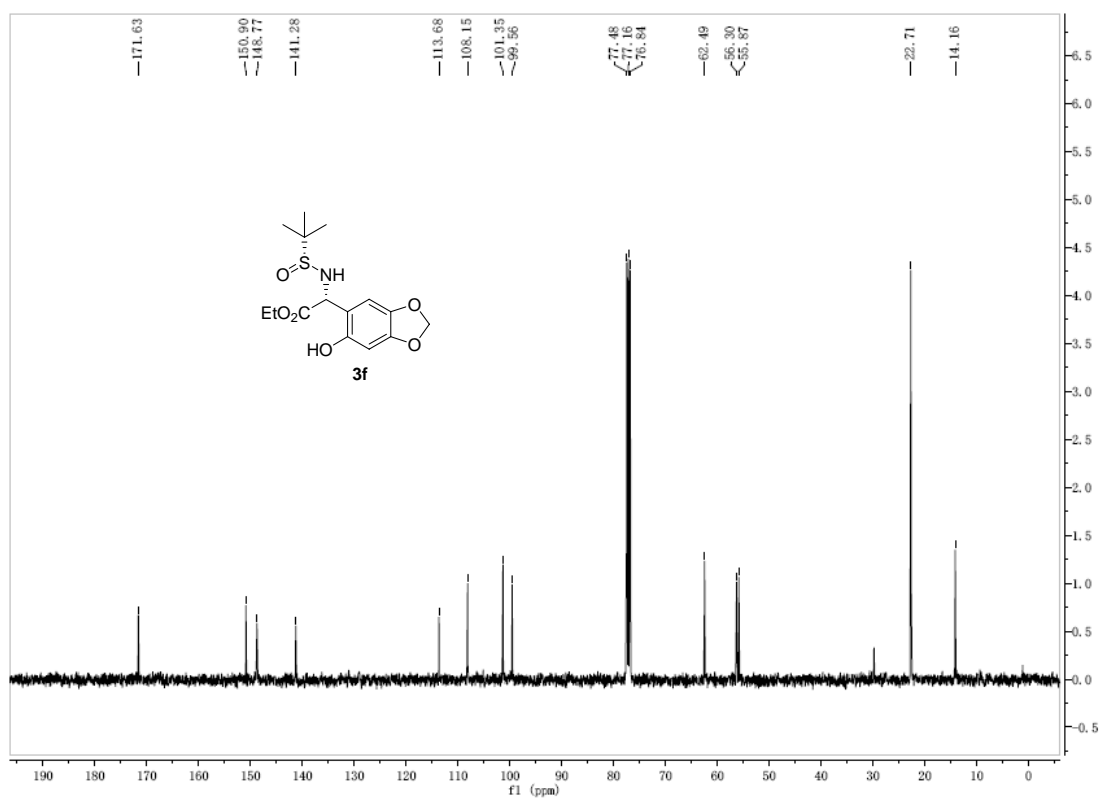

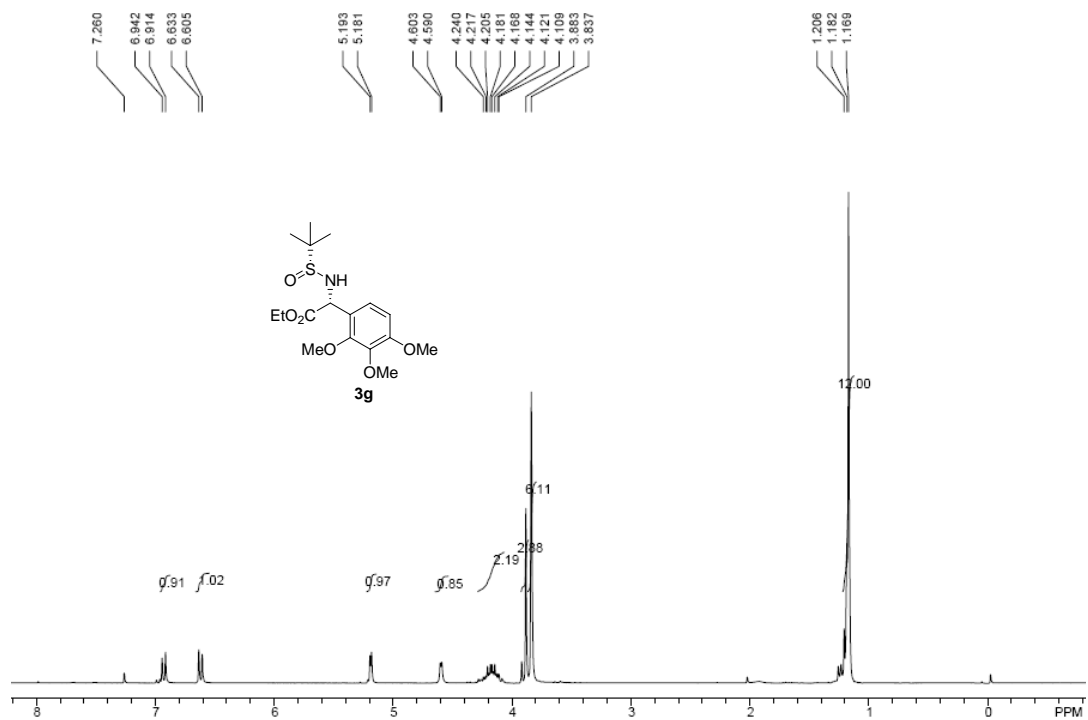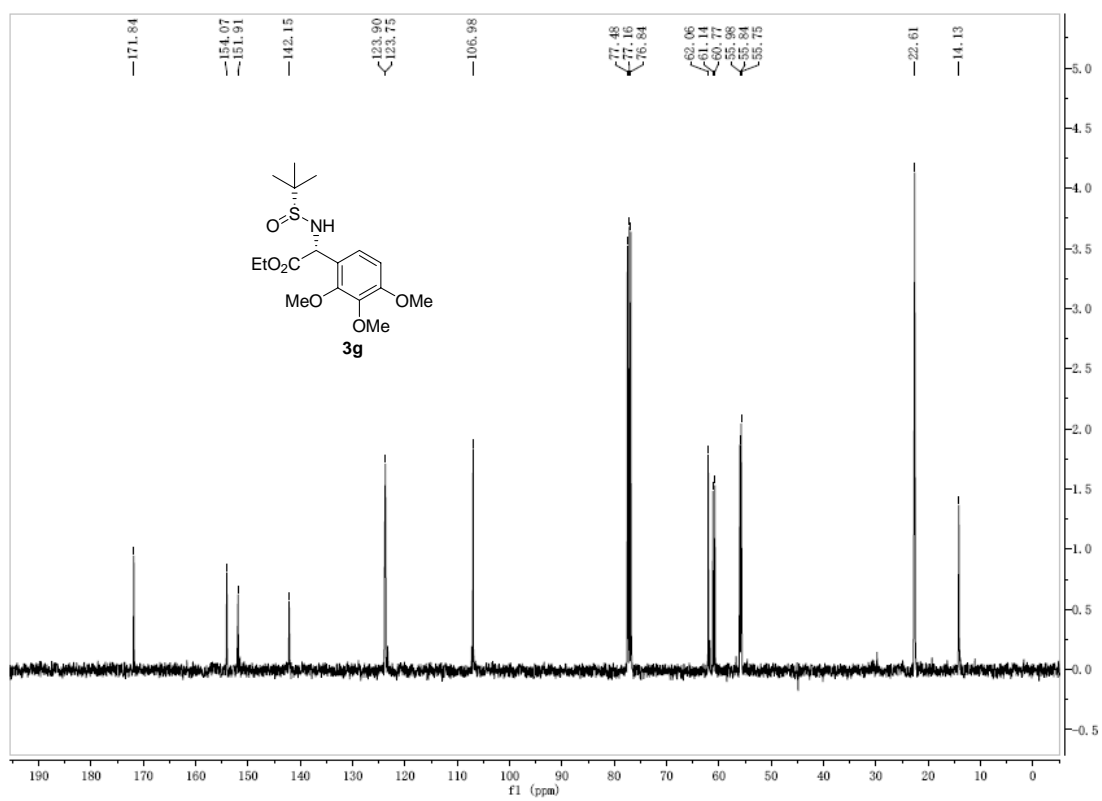

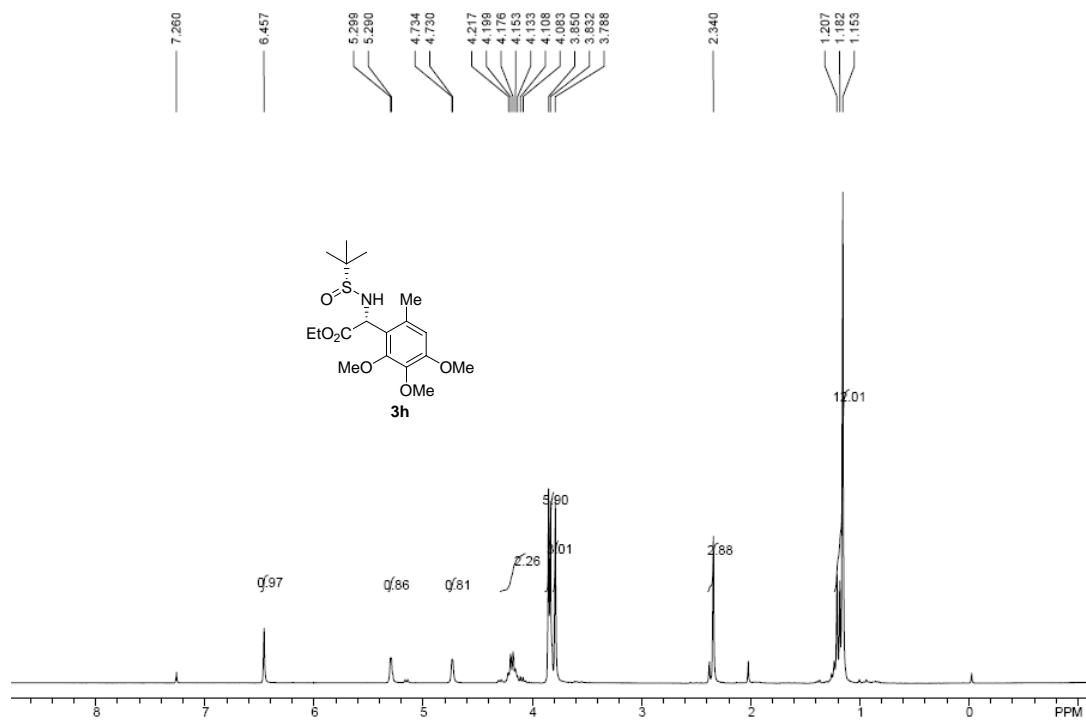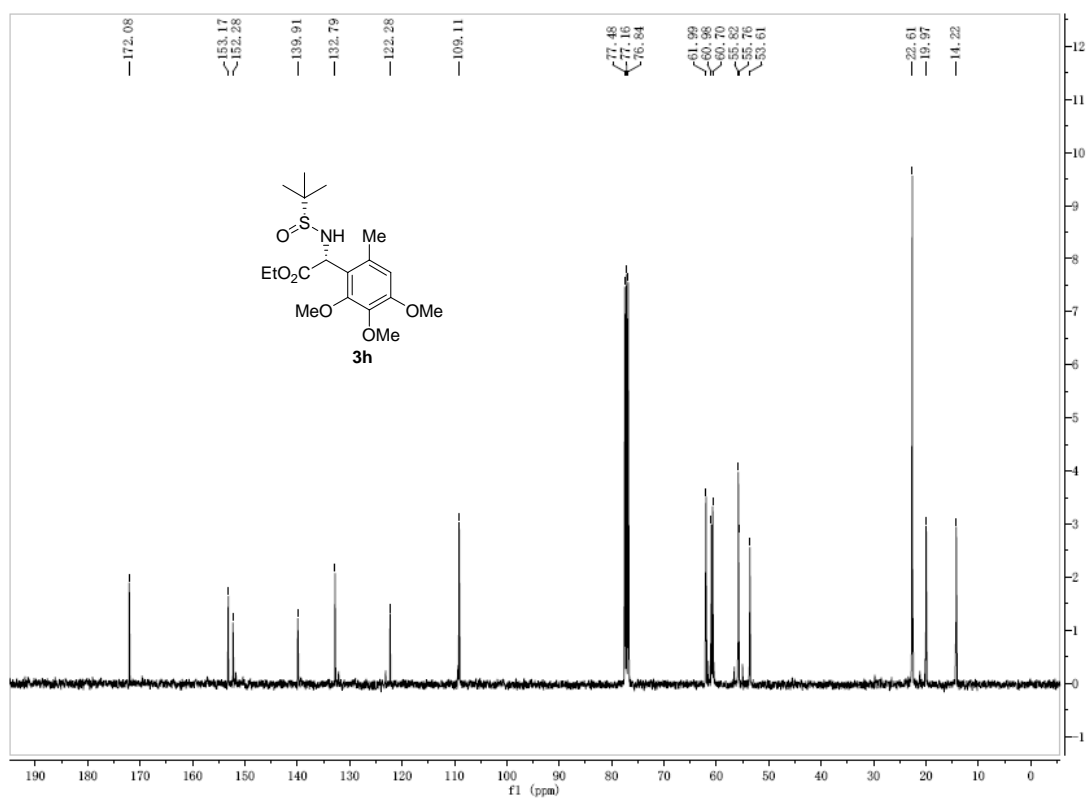

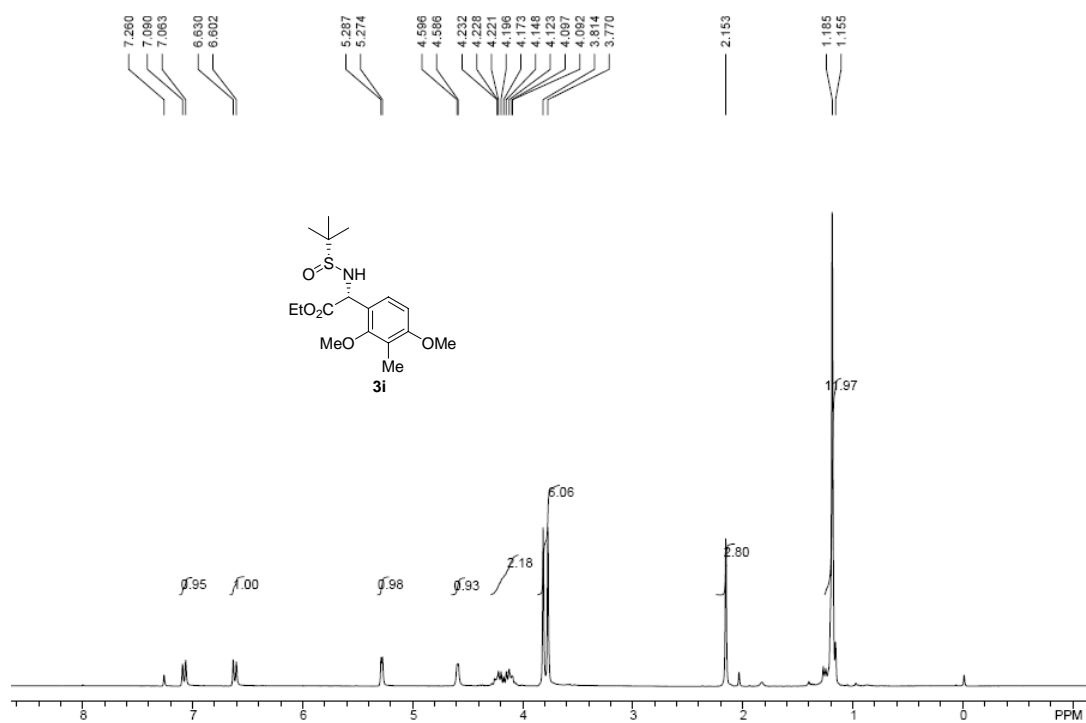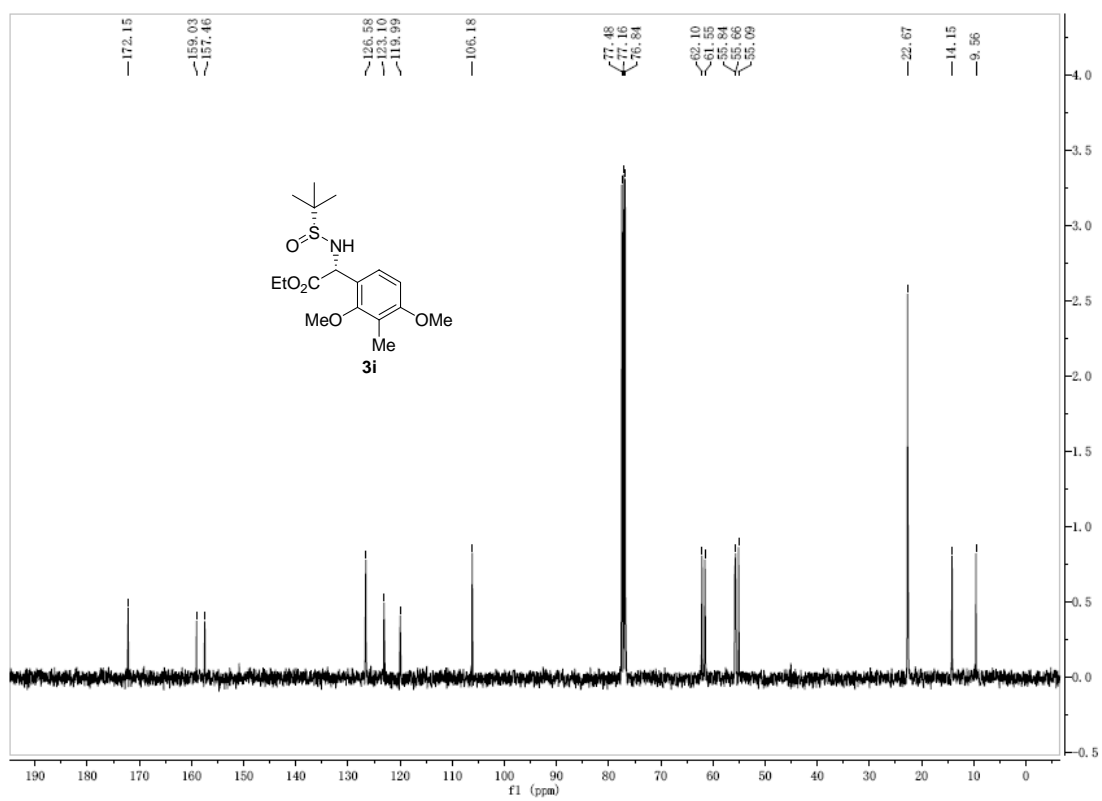





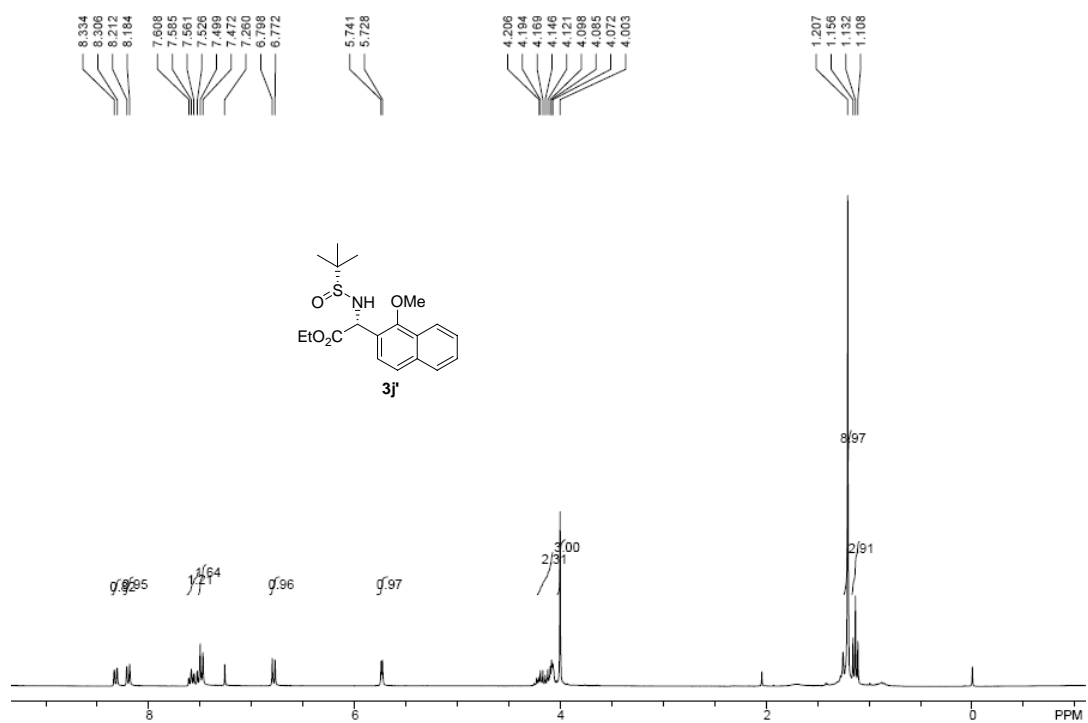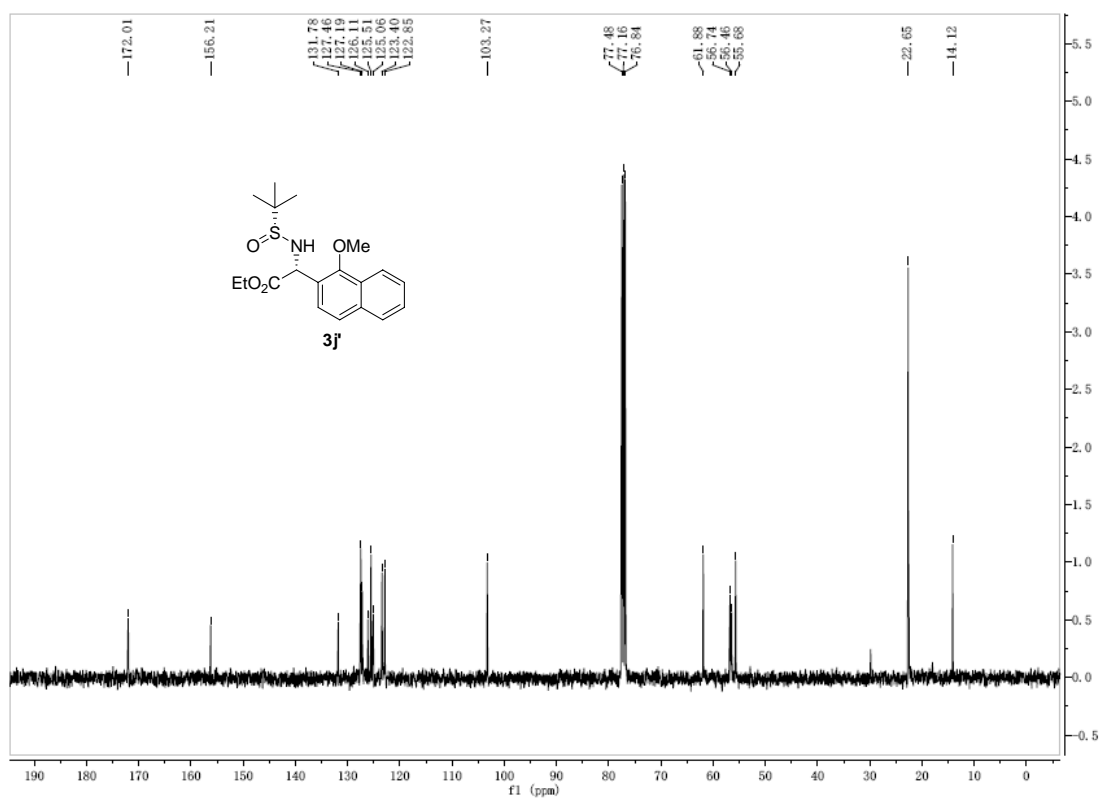

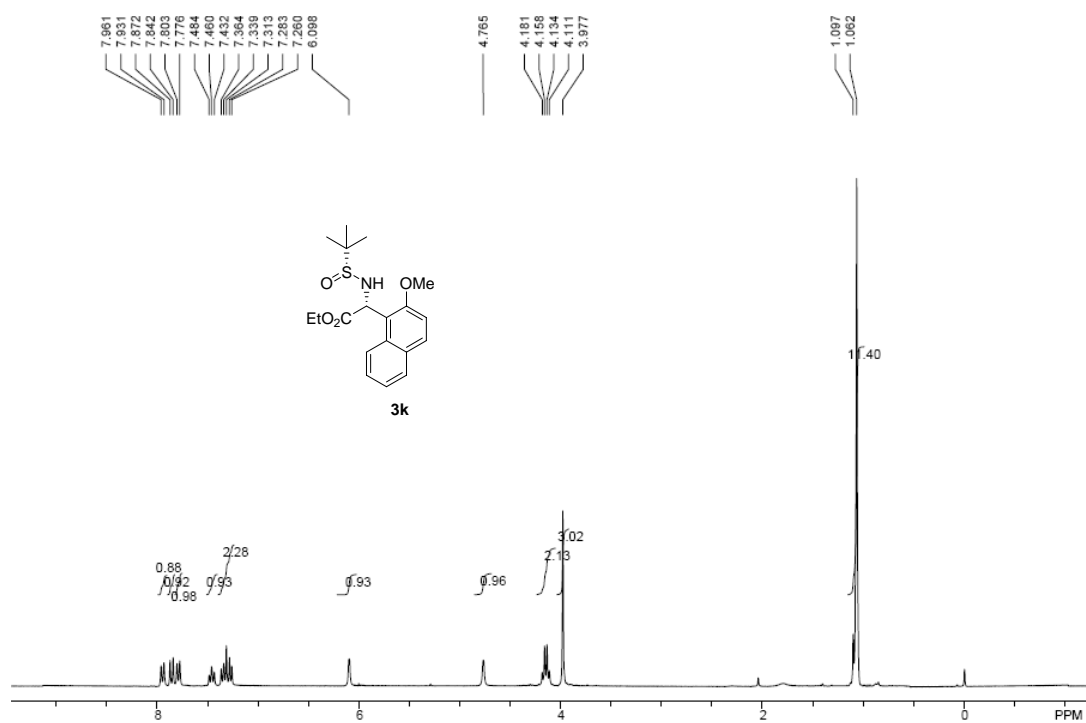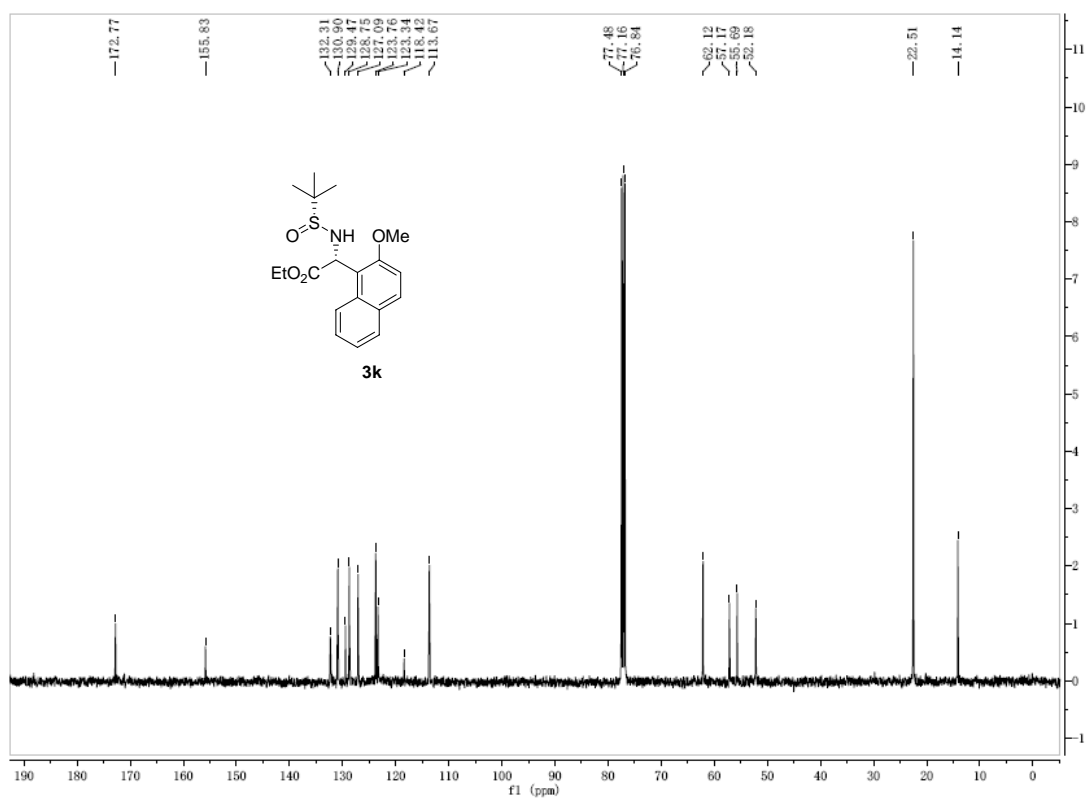

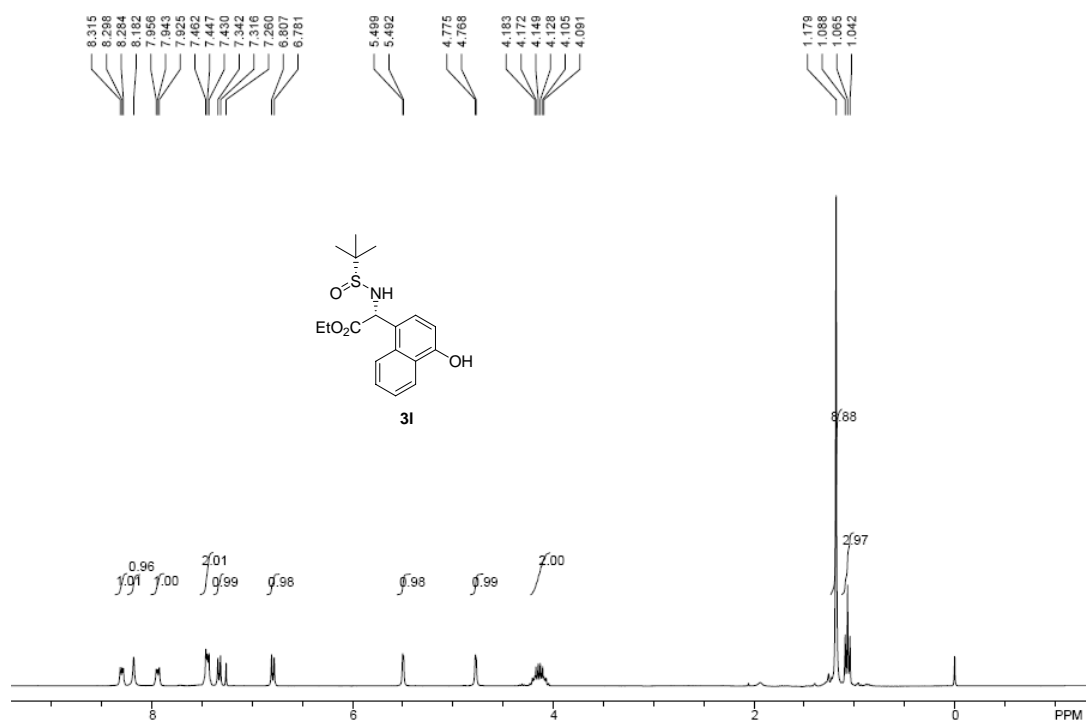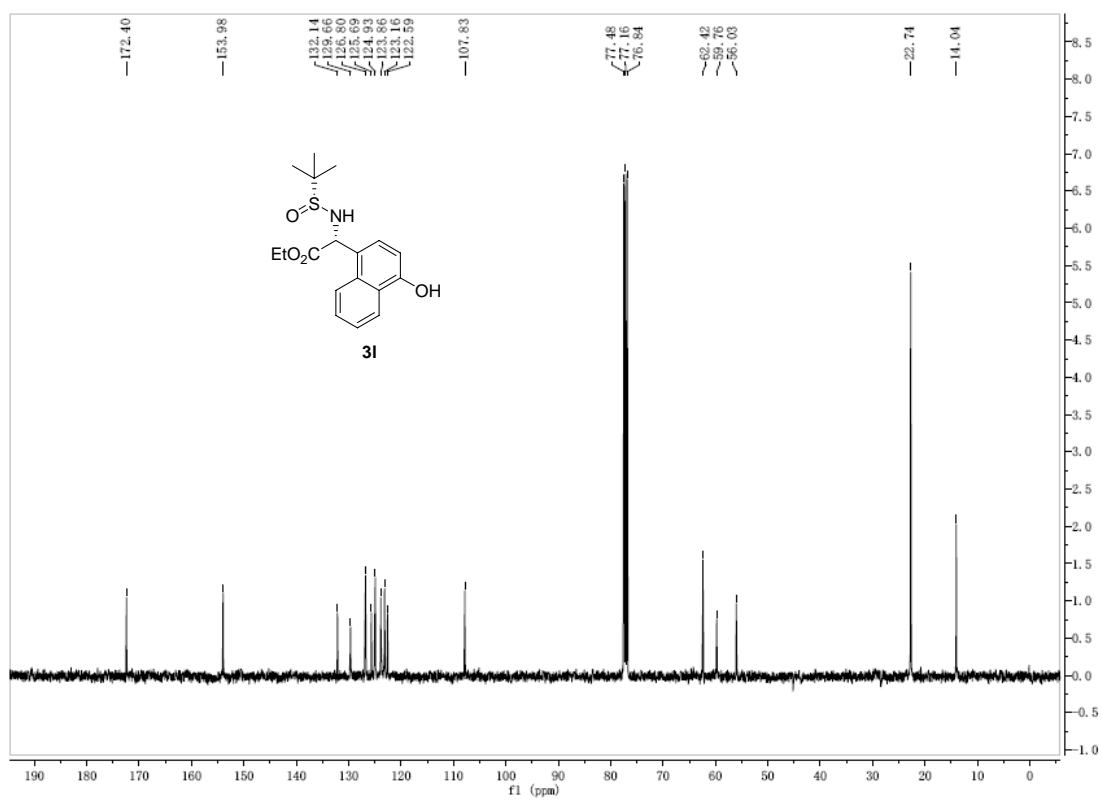

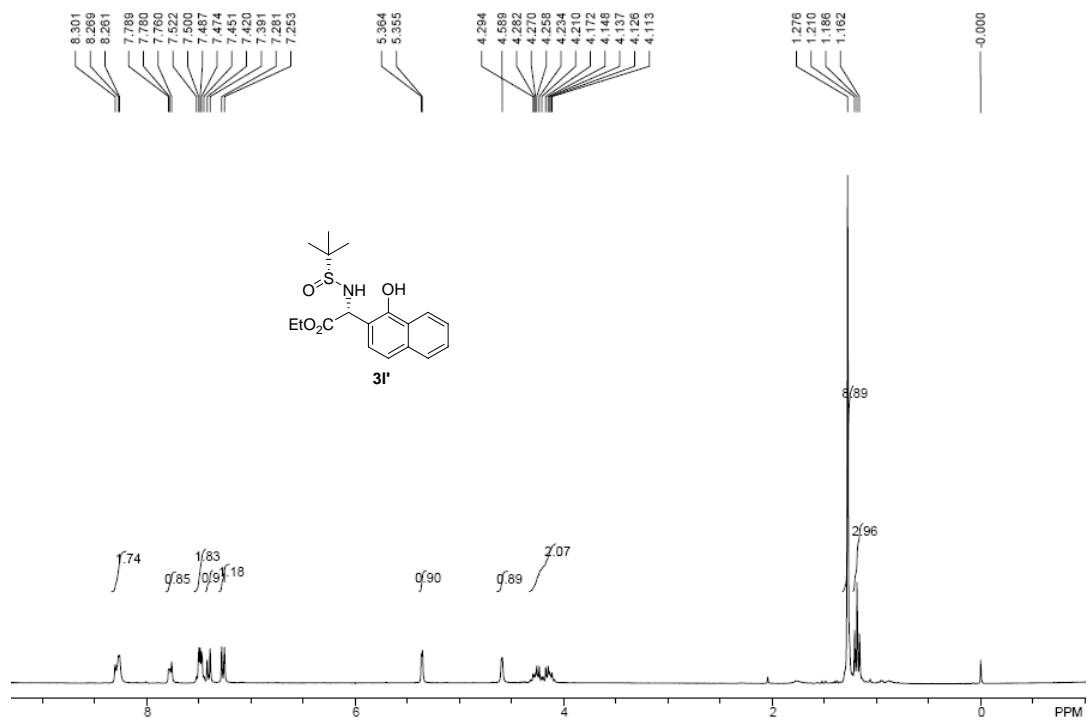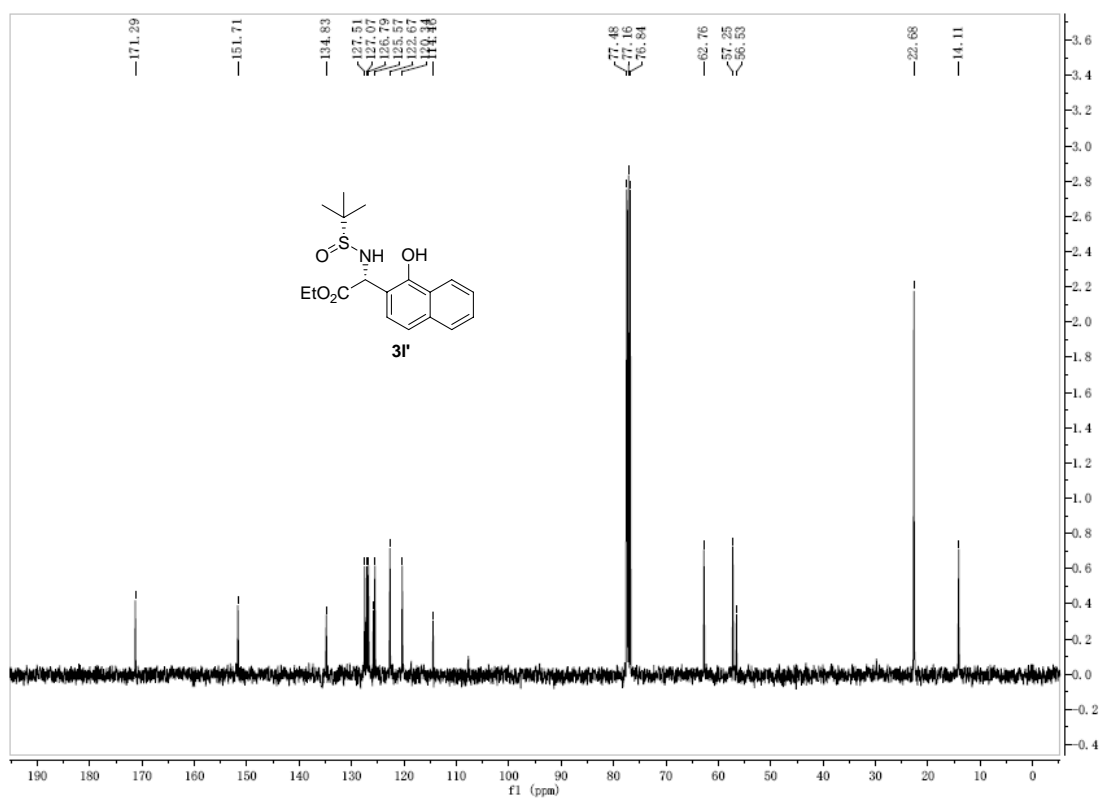

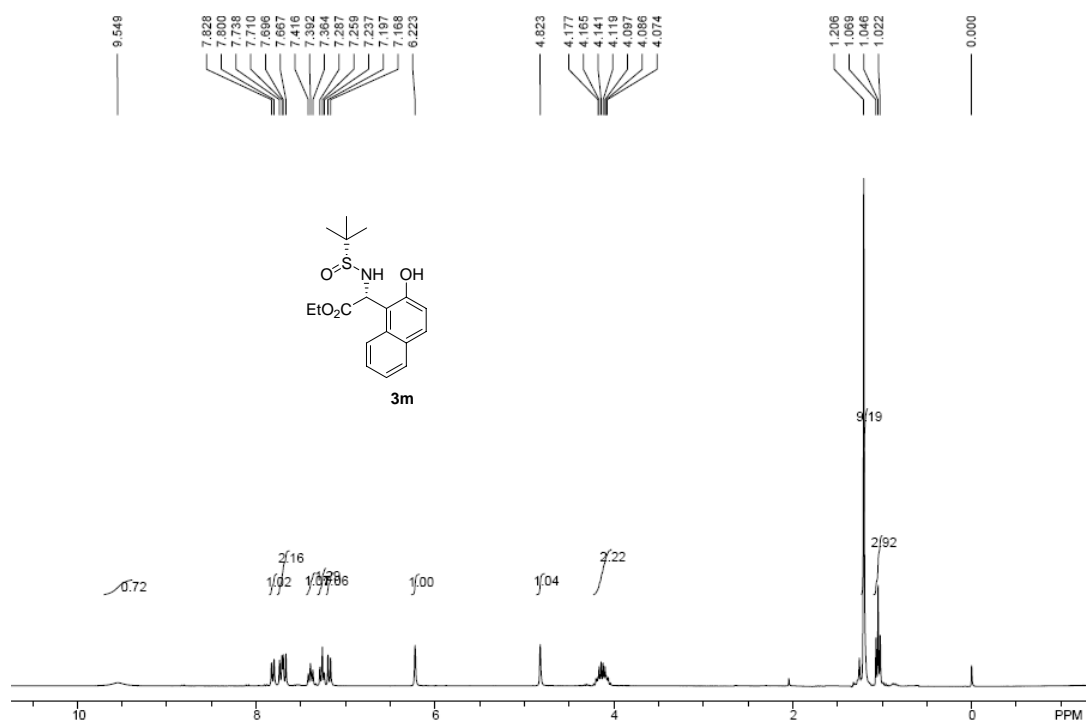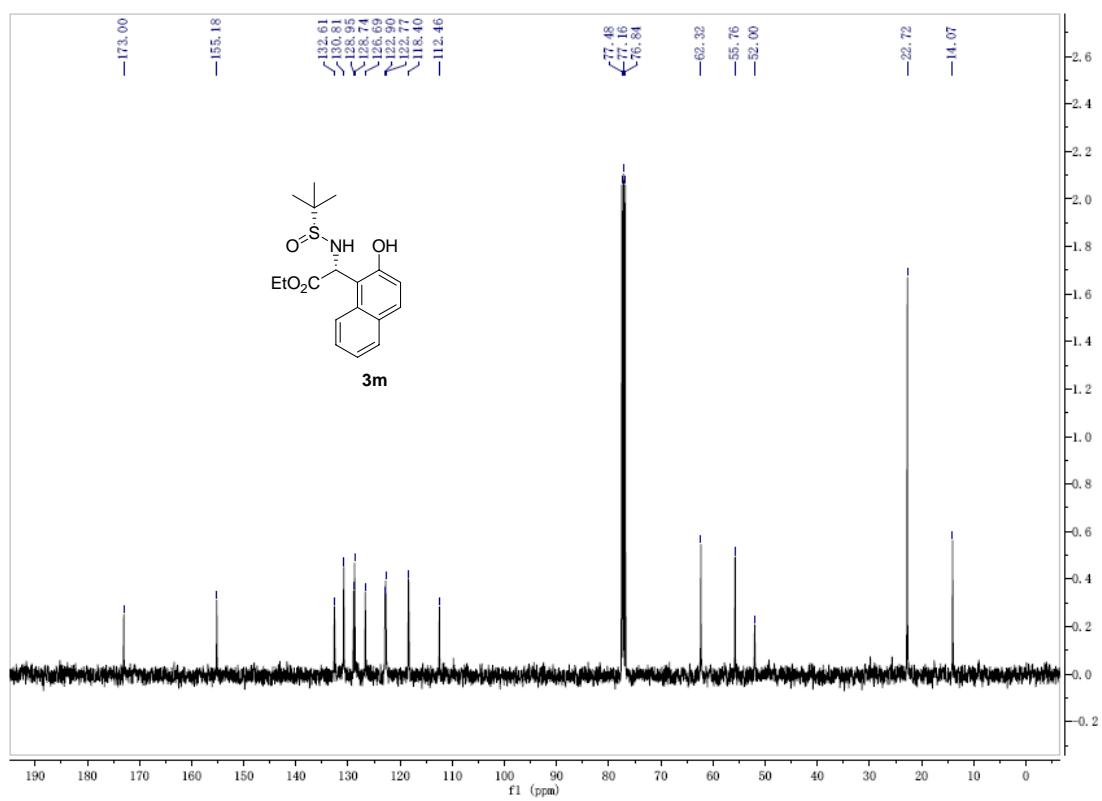

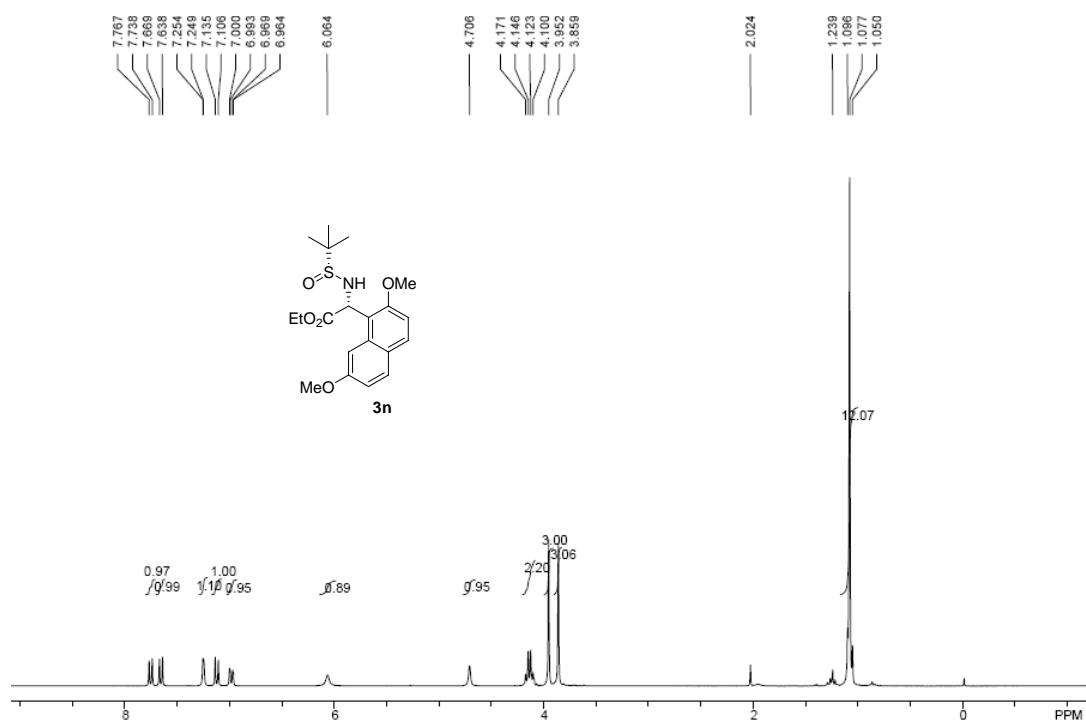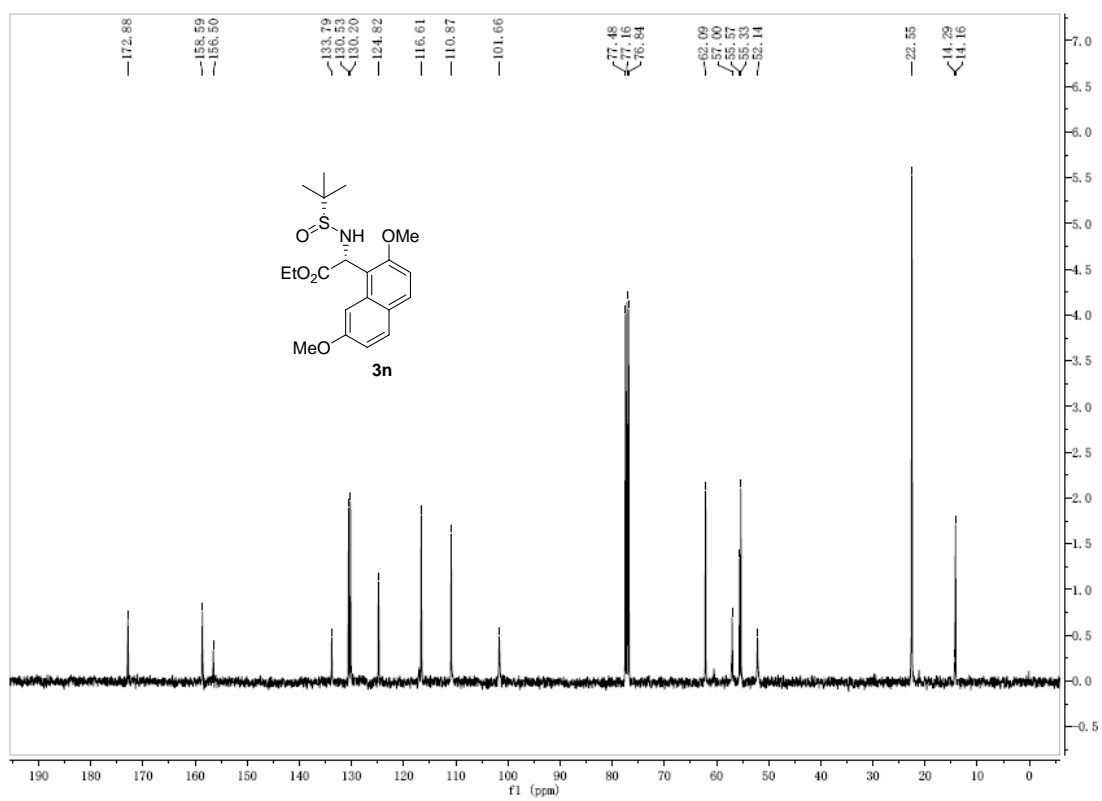

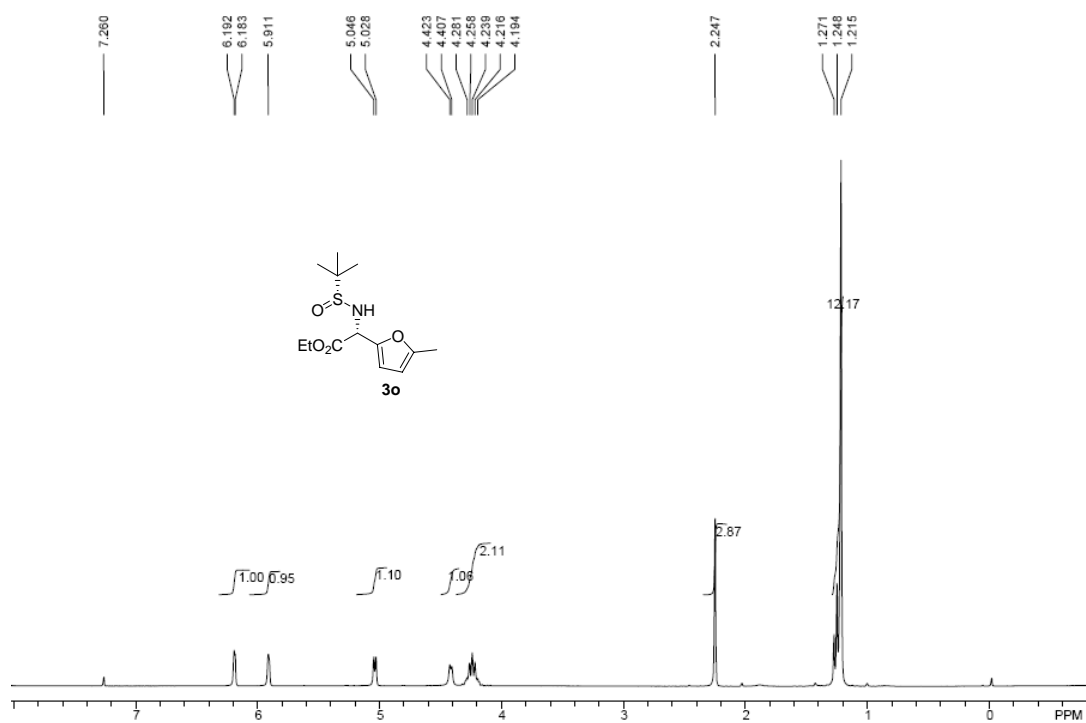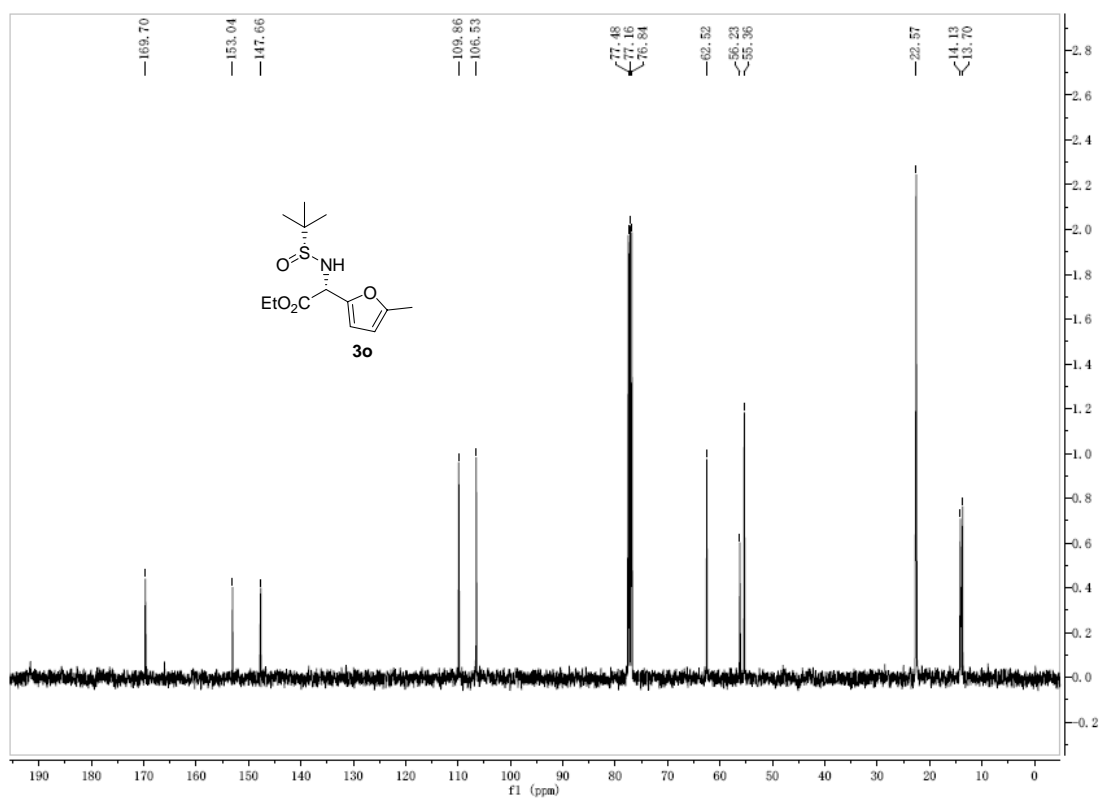



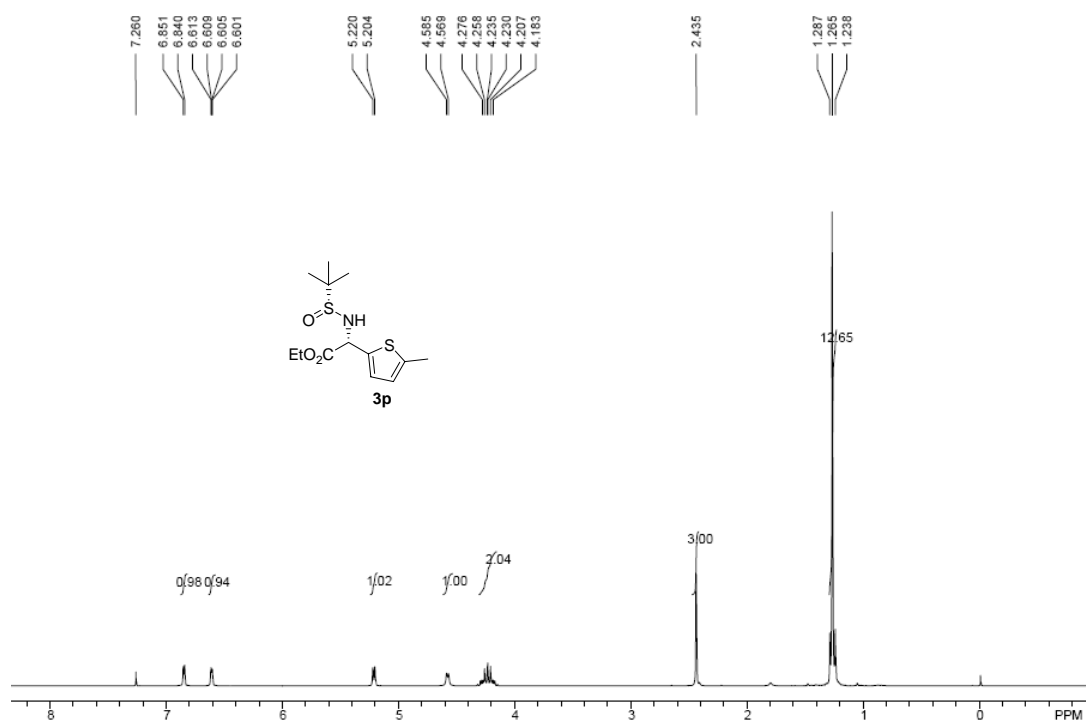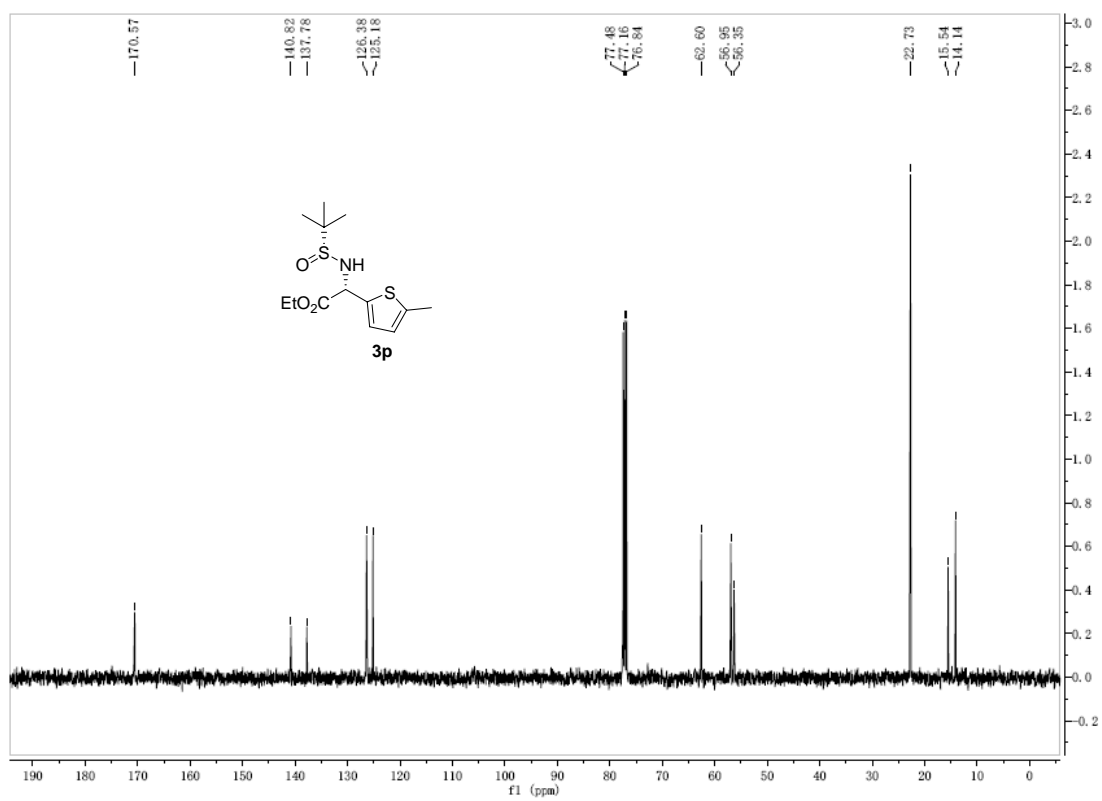

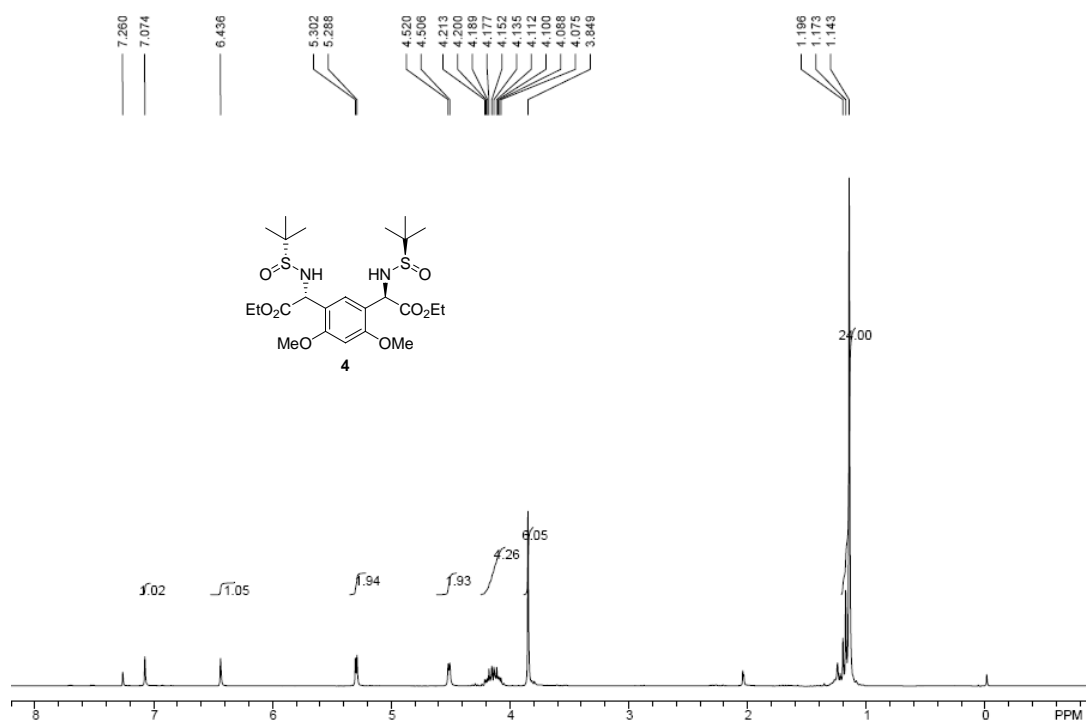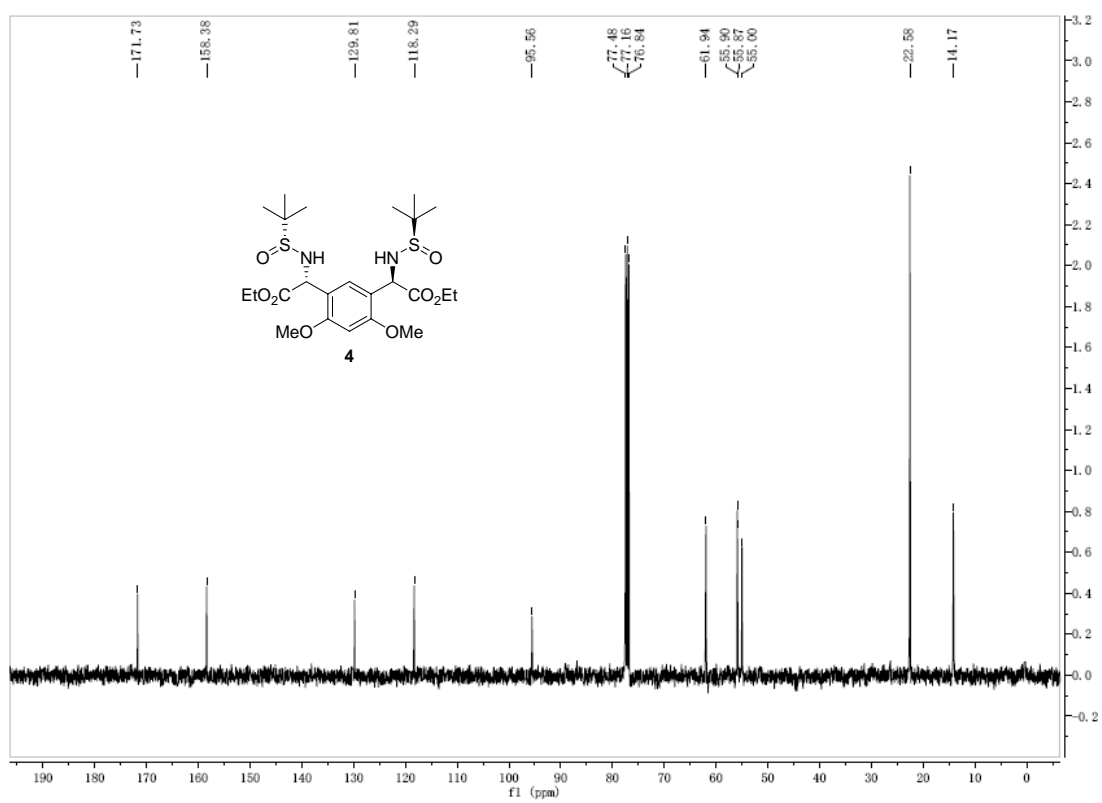

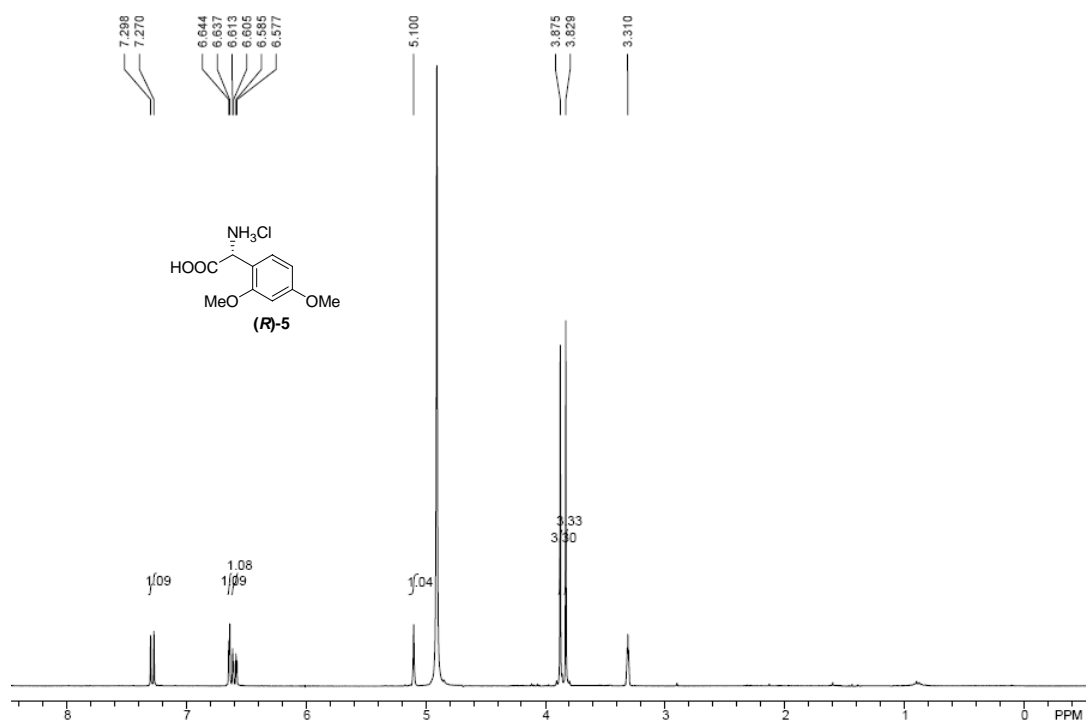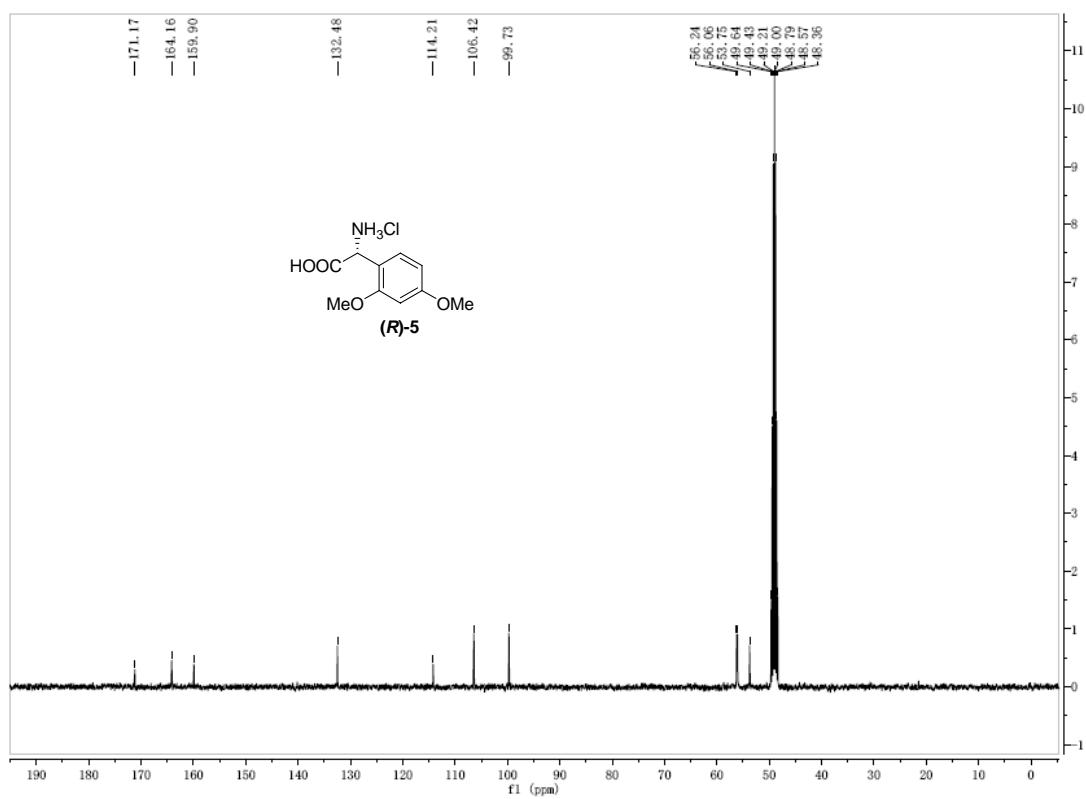

Supplement: c1ob06450a.pdf [file c1ob06450a.pdf]
